# Supplementary material for: Impact of Donor Human Milk in the Preterm Very Low Birth Weight Gut Transcriptome Profile by Use of Exfoliated Intestinal Cells
Source: PubMed Central journal article supplement (PMC6893464; doi:10.3390/nu11112677), 2019-11-05
Supplement: nutrients-11-02677-s001.pdf [file nutrients-11-02677-s001.pdf]

**Supplementary material**

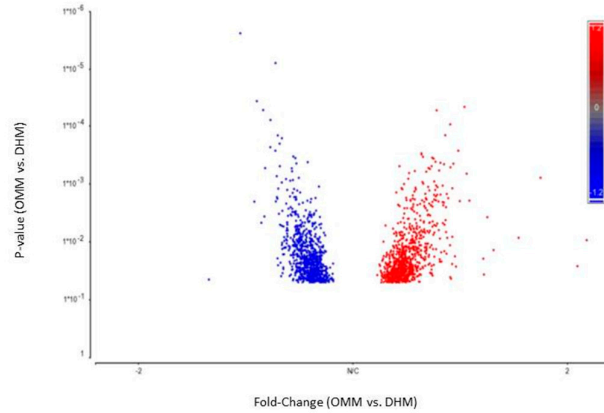

**Figure S1.** Volcano Plot of differentially expressed genes between preterm infants fed own mother’s milk (OMM) or pasteurized donated human milk (DHM).

**Table S1.** The 10 most representative biological processes filtered for enrichment p-value in preterm infants.

| <b>Biological Processes</b>                | <b>p-value</b>         | <b>Quantity of DEG*</b> |
|--------------------------------------------|------------------------|-------------------------|
| Transcription, DNA-templated               | 3.62x10 <sup>-24</sup> | 189                     |
| Regulation of transcription, DNA-templated | 5.34x10 <sup>-22</sup> | 188                     |
| Transport                                  | 3.75x10 <sup>-17</sup> | 140                     |
| Cell cycle                                 | 1.03x10 <sup>-13</sup> | 65                      |
| Gene expression                            | 3.38x10 <sup>-10</sup> | 60                      |
| Multicellular organismal development       | 6.97x10 <sup>-10</sup> | 86                      |

|                   |                        |    |
|-------------------|------------------------|----|
| Protein transport | 1.73x10 <sup>-09</sup> | 56 |
| Cell division     | 2.75x10 <sup>-09</sup> | 39 |
| Blood coagulation | 3.38x10 <sup>-09</sup> | 46 |
| DNA repair        | 8.34x10 <sup>-09</sup> | 39 |

**Table S2.** Differential genes in transcriptomic analysis of exfoliated epithelial intestinal cells between preterm infants fed own mother's milk (OMM) and pasteurized donated human milk (DHM).

| <b>Gene name</b>                                   | <b>Gene Symbol</b> | <b>p-value<br/>(OMM vs. DHM)</b> | <b>Fold-Change<br/>(OMM vs. DHM)</b> |
|----------------------------------------------------|--------------------|----------------------------------|--------------------------------------|
| Lactalbumin, alpha                                 | LALBA              | 0.0024                           | 2.92                                 |
| Casein kappa                                       | CSN3               | 0.0024                           | 2.59                                 |
| Casein beta                                        | CSN2               | 0.0093                           | 2.13                                 |
| Cytochrome c oxidase subunit I                     | COX1               | 0.0263                           | 2.07                                 |
| Casein alpha s1                                    | CSN1S1             | 0.0084                           | 1.71                                 |
| Espin                                              | ESPN               | 0.0008                           | 1.58                                 |
| MTND2                                              | ND2                | 0.0138                           | 1.57                                 |
| Small ubiquitin-like modifier 3                    | SUMO3              | 0.0037                           | 1.54                                 |
| Eukaryotic translation elongation factor 1 alpha 1 | EEF1A1             | 0.0365                           | 1.53                                 |
| Ribosomal protein L10                              | RPL10              | 0.0195                           | 1.52                                 |
| Keratin associated protein 2-4                     | KRTAP2-4           | 0.0019                           | 1.46                                 |
| Serine peptidase inhibitor, Kunitz type 1          | SPINT1             | 0.0007                           | 1.44                                 |
| Zinc finger family member 788                      | ZNF788             | 0.0000                           | 1.43                                 |
| Mitochondrial ribosomal protein L38                | MRPL38             | 0.0020                           | 1.41                                 |
| Diacylglycerol O-acyltransferase 1                 | DGAT1              | 0.0003                           | 1.41                                 |
| Tumor protein, translationally-controlled 1        | TPT1               | 0.0267                           | 1.39                                 |
| Retinol binding protein 2, cellular                | RBP2               | 0.0178                           | 1.39                                 |
| Transmembrane protein 121                          | TMEM121            | 0.0004                           | 1.38                                 |
| Ankyrin repeat domain 9                            | ANKRD9             | 0.0012                           | 1.38                                 |
| Ribosomal protein L12                              | RPL12              | 0.0082                           | 1.38                                 |
| Family with sequence similarity 47, member B       | FAM47B             | 0.0241                           | 1.38                                 |
| Acetylcholinesterase (Yt blood group)              | ACHE               | 0.0431                           | 1.37                                 |

|                                                              |           |        |      |
|--------------------------------------------------------------|-----------|--------|------|
| Ribosomal protein S28                                        | RPS28     | 0.0005 | 1.37 |
| Keratin associated protein 17-1                              | KRTAP17-1 | 0.0406 | 1.37 |
| Transcript Identified by aceview,<br>Entrez Gene ID(s)       | NFRKB     | 0.0001 | 1.37 |
| Memczak2013 ANTISENSE, CDS,<br>coding, INTERNAL best transcr | PPP6R1    | 0.0114 | 1.37 |
| Cleavage and polyadenylation<br>specific factor 4            | CPSF4     | 0.0018 | 1.36 |
| Ribosomal protein L36a                                       | RPL36A    | 0.0085 | 1.36 |
| PYD and CARD domain containing                               | PYCARD    | 0.0015 | 1.35 |
| Tweety family member 1                                       | TTYH1     | 0.0160 | 1.35 |
| FLT3-interacting zinc finger 1                               | FIZ1      | 0.0068 | 1.35 |
| Cyclin-dependent kinase 4                                    | CDK4      | 0.0025 | 1.35 |
| Endo-beta-N-acetylglucosaminidase                            | ENGASE    | 0.0042 | 1.35 |
| Protein phosphatase 1, regulatory<br>subunit 18              | PPP1R18   | 0.0001 | 1.35 |
| Ankyrin repeat and SOCS box<br>containing 5                  | ASB5      | 0.0051 | 1.34 |
| Regulator of G-protein signaling 14                          | RGS14     | 0.0145 | 1.34 |
| Tumor suppressing subtransferable<br>candidate 4             | TSSC4     | 0.0005 | 1.34 |
| Ring finger protein 44                                       | RNF44     | 0.0021 | 1.34 |
| Ribosomal protein L24                                        | RPL24     | 0.0023 | 1.34 |
| Acetylserotonin O-<br>methyltransferase-like                 | ASMTL     | 0.0048 | 1.34 |
| Acetylserotonin O-<br>methyltransferase-like                 | ASMTL     | 0.0048 | 1.34 |
| Fascin actin-bundling protein 2,<br>retinal                  | FSCN2     | 0.0011 | 1.34 |
| Centromere protein M                                         | CENPM     | 0.0021 | 1.34 |
| Zinc finger, DHHC-type containing 3                          | ZDHHC3    | 0.0218 | 1.33 |
| Metallothionein 2A                                           | MT2A      | 0.0152 | 1.33 |
| Transmembrane protein 129, E3<br>ubiquitin protein ligase    | TMEM129   | 0.0015 | 1.33 |
| Cathepsin S                                                  | CTSS      | 0.0004 | 1.33 |
| Ribosomal protein S28                                        | RPS28     | 0.0088 | 1.32 |
| Calcium channel, voltage-<br>dependent, gamma subunit 7      | CACNG7    | 0.0220 | 1.32 |
| Ribosomal protein S15                                        | RPS15     | 0.0199 | 1.32 |
| Solute carrier family 25<br>(mitochondrial carrier; adenine  | SLC25A6   | 0.0006 | 1.32 |
| CD5 molecule                                                 | CD5       | 0.0063 | 1.32 |
| 6-phosphofructo-2-kinase                                     | PFKFB4    | 0.0020 | 1.32 |
| Cell adhesion molecule 4                                     | CADM4     | 0.0011 | 1.31 |
| H3 histone, family 3A                                        | H3F3A     | 0.0048 | 1.31 |
| Atpase, class VI, type 11A                                   | ATP11A    | 0.0015 | 1.31 |
| Adrenocortical dysplasia homolog                             | ACD       | 0.0001 | 1.31 |

|                                                                       |          |        |      |
|-----------------------------------------------------------------------|----------|--------|------|
| (mouse)                                                               |          |        |      |
| Leukotriene C4 synthase                                               | LTC4S    | 0.0053 | 1.31 |
| Matrix metalloproteinase 21                                           | MMP21    | 0.0019 | 1.31 |
| Ribosomal protein L26                                                 | RPL26    | 0.0133 | 1.31 |
| Claudin 11                                                            | CLDN11   | 0.0011 | 1.31 |
| Solute carrier family 25<br>(mitochondrial carrier; adenine<br>nucleo | SLC25A6  | 0.0016 | 1.31 |
| Vesicle transport through<br>interaction with t-snares 1B             | VTI1B    | 0.0004 | 1.31 |
| Peroxisome proliferator-activated<br>receptor alpha                   | PPARA    | 0.0013 | 1.30 |
| Fizzy                                                                 | FZR1     | 0.0180 | 1.30 |
| Osteosarcoma amplified 9,<br>endoplasmic reticulum lectin             | OS9      | 0.0069 | 1.30 |
| Structural maintenance of<br>chromosomes 6                            | SMC6     | 0.0019 | 1.30 |
| Low density lipoprotein receptor<br>class A domain containing 3       | LDLRAD3  | 0.0051 | 1.30 |
| PIGB opposite strand 1                                                | PIGBOS1  | 0.0009 | 1.30 |
| Microtubule associated<br>monooxygenase, calponin and LIM<br>domain   | MICAL2   | 0.0015 | 1.30 |
| GLE1 RNA export mediator                                              | GLE1     | 0.0249 | 1.30 |
| Suppressor of cytokine signaling 7                                    | SOCS7    | 0.0004 | 1.30 |
| S100 calcium binding protein A8                                       | S100A8   | 0.0075 | 1.30 |
| Coiled-coil domain containing 130                                     | CCDC130  | 0.0133 | 1.30 |
| Interleukin 11 receptor, alpha                                        | IL11RA   | 0.0044 | 1.29 |
| Memczak2013 ANTISENSE, CDS,<br>coding, INTERNAL best transcri         | SH2B2    | 0.0382 | 1.29 |
| Neuromedin U receptor 1                                               | NMUR1    | 0.0025 | 1.29 |
| Solute carrier family 26 (anion<br>exchanger), member 1               | SLC26A1  | 0.0020 | 1.29 |
| Chromosome 11 open reading<br>frame 96                                | C11orf96 | 0.0054 | 1.29 |
| Gastrin                                                               | GAST     | 0.0004 | 1.29 |
| Heat shock 70kda protein 8                                            | HSPA8    | 0.0349 | 1.29 |
| Jeck2013 ANTISENSE, coding,<br>INTERNAL, intronic best trans          | MICAL1   | 0.0259 | 1.29 |
| Phosphatidylinositol-4-phosphate 5-<br>kinase, type I, gamma          | PIP5K1C  | 0.0005 | 1.29 |
| Keratin 38, type I                                                    | KRT38    | 0.0301 | 1.29 |
| Ribosomal protein S14                                                 | RPS14    | 0.0355 | 1.29 |
| Solute carrier family 16, member 11                                   | SLC16A11 | 0.0114 | 1.29 |
| Small arfgap2                                                         | SMAP2    | 0.0023 | 1.29 |
| Calcium-sensing receptor                                              | CASR     | 0.0035 | 1.28 |
| Metallothionein 1E                                                    | MT1E     | 0.0342 | 1.28 |

|                                                                 |           |        |      |
|-----------------------------------------------------------------|-----------|--------|------|
| Brain protein I3                                                | BRI3      | 0.0124 | 1.28 |
| Ribosomal protein, large, P1                                    | RPLP1     | 0.0064 | 1.28 |
| Calcium                                                         | CAMK1G    | 0.0046 | 1.28 |
| Ring finger protein 31                                          | RNF31     | 0.0006 | 1.28 |
| Solute carrier family 11 (proton-coupled divalent metal ion tra | SLC11A1   | 0.0235 | 1.28 |
| Dihydrouridine synthase 3-like                                  | DUS3L     | 0.0013 | 1.28 |
| Neuroglobin                                                     | NGB       | 0.0047 | 1.28 |
| Chromosome 1 open reading frame 145                             | C1orf145  | 0.0022 | 1.28 |
| NAC alpha domain containing                                     | NACAD     | 0.0168 | 1.28 |
| Bone morphogenetic protein 1                                    | BMP1      | 0.0069 | 1.28 |
| Patched 2                                                       | PTCH2     | 0.0180 | 1.28 |
| Transmembrane protein 238                                       | TMEM238   | 0.0005 | 1.28 |
| Double homeobox 1                                               | DUX1      | 0.0034 | 1.28 |
| Lens intrinsic membrane protein 2                               | LIM2      | 0.0247 | 1.28 |
| Solute carrier family 39 (zinc transporter), member 10          | SLC39A10  | 0.0011 | 1.27 |
| Rho                                                             | ARHGEF18  | 0.0107 | 1.27 |
| SID1 transmembrane family, member 2                             | SIDT2     | 0.0035 | 1.27 |
| Protease, serine, 56                                            | PRSS56    | 0.0065 | 1.27 |
| L antigen family, member 3                                      | LAGE3     | 0.0029 | 1.27 |
| Colipase, pancreatic                                            | CLPS      | 0.0108 | 1.27 |
| G-2 and S-phase expressed 1                                     | GTSE1     | 0.0019 | 1.27 |
| Retinol binding protein 1, cellular                             | RBP1      | 0.0131 | 1.27 |
| Chromosome 9 open reading frame 50                              | C9orf50   | 0.0141 | 1.27 |
| Memczak2013 ANTISENSE, CDS, coding, INTERNAL best transcript    | GRN       | 0.0135 | 1.27 |
| Major histocompatibility complex, class I, L (pseudogene)       | HLA-L     | 0.0121 | 1.27 |
| KIAA0895-like                                                   | KIAA0895L | 0.0006 | 1.27 |
| Inositol polyphosphate-5-phosphatase D                          | INPP5D    | 0.0018 | 1.27 |
| Transketolase-like 1                                            | TKTL1     | 0.0158 | 1.27 |
| Proline-rich transmembrane protein 2                            | PRRT2     | 0.0018 | 1.27 |
| Cytochrome c oxidase subunit IV isoform 2 (lung)                | COX4I2    | 0.0026 | 1.26 |
| Ribonuclease P                                                  | RPP21     | 0.0107 | 1.26 |
| Kruppel-like factor 1 (erythroid)                               | KLF1      | 0.0015 | 1.26 |
| Enhancer of mrna decapping 4                                    | EDC4      | 0.0200 | 1.26 |
| Ribosomal protein L15                                           | RPL15     | 0.0181 | 1.26 |
| Glyceraldehyde-3-phosphate dehydrogenase                        | GAPDH     | 0.0258 | 1.26 |
| C-type lectin domain family 18,                                 | CLEC18A   | 0.0070 | 1.26 |

member A

|                                                               |                 |        |      |
|---------------------------------------------------------------|-----------------|--------|------|
| SPECC1L-ADORA2A readthrough (NMD candidate)                   | SPECC1L-ADORA2A | 0.0145 | 1.26 |
| Basic transcription factor 3                                  | BTF3            | 0.0125 | 1.26 |
| Transmembrane protein 132A                                    | TMEM132A        | 0.0024 | 1.26 |
| Hypoxia up-regulated 1                                        | HYOU1           | 0.0207 | 1.26 |
| Zinc finger protein 789                                       | ZNF789          | 0.0024 | 1.26 |
| CUB and Sushi multiple domains 1                              | CSMD1           | 0.0061 | 1.26 |
| T-box 15                                                      | TBX15           | 0.0020 | 1.26 |
| CMT1A duplicated region transcript 1                          | CDRT1           | 0.0066 | 1.26 |
| Keratin 37, type I                                            | KRT37           | 0.0044 | 1.26 |
| Fc receptor-like B                                            | FCRLB           | 0.0046 | 1.26 |
| Chromosome 20 open reading frame 27                           | C20orf27        | 0.0082 | 1.26 |
| Milk fat globule-EGF factor 8 protein                         | MFGE8           | 0.0010 | 1.26 |
| Guanine nucleotide binding protein (G protein) alpha 12       | GNA12           | 0.0192 | 1.25 |
| Myosin, heavy chain 7B, cardiac muscle, beta                  | MYH7B           | 0.0003 | 1.25 |
| N-myc downstream regulated 1                                  | NDRG1           | 0.0283 | 1.25 |
| Neural cell adhesion molecule 1                               | NCAM1           | 0.0269 | 1.25 |
| Chromosome 7 open reading frame 73                            | C7orf73         | 0.0068 | 1.25 |
| X-linked Kx blood group related 4                             | XKR4            | 0.0009 | 1.25 |
| Zinc finger protein 613                                       | ZNF613          | 0.0019 | 1.25 |
| Ribosomal protein L4                                          | RPL4            | 0.0186 | 1.25 |
| Atpase, aminophospholipid transporter, class I, type 8B, memb | ATP8B3          | 0.0003 | 1.25 |
| Acetylcholinesterase (Yt blood group)                         | ACHE            | 0.0003 | 1.25 |
| CD320 molecule                                                | CD320           | 0.0087 | 1.25 |
| L1 cell adhesion molecule                                     | L1CAM           | 0.0063 | 1.25 |
| G protein-coupled receptor 6                                  | GPR6            | 0.0142 | 1.25 |
| Cilia and flagella associated protein 74                      | CFAP74          | 0.0076 | 1.25 |
| Atpase, class V, type 10A                                     | ATP10A          | 0.0114 | 1.25 |
| Prosaposin                                                    | PSAP            | 0.0370 | 1.25 |
| Left-right determination factor 2                             | LEFTY2          | 0.0181 | 1.25 |
| Protease, serine 27                                           | PRSS27          | 0.0139 | 1.24 |
| Trna methyltransferase 2 homolog A                            | TRMT2A          | 0.0168 | 1.24 |
| G-patch domain containing 8                                   | GPATCH8         | 0.0078 | 1.24 |
| LSM12 homolog                                                 | LSM12           | 0.0042 | 1.24 |
| Ribosomal protein L36a                                        | RPL36A          | 0.0293 | 1.24 |
| Bone morphogenetic protein                                    | BRINP2          | 0.0077 | 1.24 |
| Memczak2013 ANTISENSE, CDS, coding, INTERNAL best transcri    | RBM26           | 0.0296 | 1.24 |

|                                                              |           |        |      |
|--------------------------------------------------------------|-----------|--------|------|
| SUZ RNA binding domain containing 1                          | SZRD1     | 0.0022 | 1.24 |
| Golgin A7 family, member B                                   | GOLGA7B   | 0.0035 | 1.24 |
| KIAA1456                                                     | KIAA1456  | 0.0361 | 1.24 |
| Collagen, type VIII, alpha 1                                 | COL8A1    | 0.0487 | 1.24 |
| Claudin 7                                                    | CLDN7     | 0.0056 | 1.24 |
| Transcript Identified by aceview, Entrez Gene ID(s)          | DNAI1     | 0.0067 | 1.24 |
| Angiopoietin like 6                                          | ANGPTL6   | 0.0232 | 1.24 |
| Butyrophilin, subfamily 2, member A2                         | BTN2A2    | 0.0115 | 1.24 |
| Importin 5                                                   | IPO5      | 0.0113 | 1.24 |
| Coiled-coil domain containing 71                             | CCDC71    | 0.0087 | 1.24 |
| RNA binding motif protein 38                                 | RBM38     | 0.0070 | 1.24 |
| Family with sequence similarity 222, member B                | FAM222B   | 0.0227 | 1.24 |
| Ankyrin repeat and SOCS box containing 8                     | ASB8      | 0.0101 | 1.24 |
| Copine VII                                                   | CPNE7     | 0.0484 | 1.24 |
| Atpase type 13A1                                             | ATP13A1   | 0.0130 | 1.24 |
| Synaptophysin                                                | SYP       | 0.0150 | 1.24 |
| Smoothed, frizzled class receptor                            | SMO       | 0.0166 | 1.24 |
| Ribosomal protein S17                                        | RPS17     | 0.0383 | 1.24 |
| Ubia prenyltransferase domain containing 1                   | UBIAD1    | 0.0386 | 1.23 |
| Carnosine synthase 1                                         | CARNS1    | 0.0262 | 1.23 |
| Cathepsin W                                                  | CTSW      | 0.0276 | 1.23 |
| Janus kinase 1                                               | JAK1      | 0.0317 | 1.23 |
| Tumor protein p63 regulated 1                                | TPRG1     | 0.0023 | 1.23 |
| Calcium channel, voltage-dependent, N type, alpha 1B subunit | CACNA1B   | 0.0125 | 1.23 |
| Zinc finger protein 600                                      | ZNF600    | 0.0134 | 1.23 |
| Acid sensing ion channel family member 4                     | ASIC4     | 0.0147 | 1.23 |
| Transcription factor binding to IGHM enhancer 3              | TFE3      | 0.0224 | 1.23 |
| Ring finger protein 126                                      | RNF126    | 0.0154 | 1.23 |
| Tubulin, beta 2B class iib                                   | TUBB2B    | 0.0060 | 1.23 |
| Lipin 1                                                      | LPIN1     | 0.0032 | 1.23 |
| POM121 transmembrane nucleoporin-like 12                     | POM121L12 | 0.0053 | 1.23 |
| Cramped chromatin regulator homolog 1                        | CRAMP1    | 0.0078 | 1.23 |
| Jun B proto-oncogene                                         | JUNB      | 0.0274 | 1.23 |
| Uncharacterized LOC388282                                    | LOC388282 | 0.0397 | 1.23 |
| Allograft inflammatory factor 1-like                         | AIF1L     | 0.0317 | 1.23 |
| Tumor necrosis factor receptor                               | TNFRSF25  | 0.0290 | 1.23 |

|                                                                                                                         |             |        |      |
|-------------------------------------------------------------------------------------------------------------------------|-------------|--------|------|
| superfamily, member 25                                                                                                  |             |        |      |
| G protein-coupled receptor kinase interacting arfgap 1                                                                  | GIT1        | 0.0278 | 1.23 |
| Dynein, axonemal, assembly factor 3                                                                                     | DNAAF3      | 0.0131 | 1.23 |
| BCL2-like 14 (apoptosis facilitator)                                                                                    | BCL2L14     | 0.0294 | 1.23 |
| WD repeat domain 86                                                                                                     | WDR86       | 0.0080 | 1.23 |
| Secretoglobin, family 3A, member 1                                                                                      | SCGB3A1     | 0.0090 | 1.23 |
| Zinc finger protein 749                                                                                                 | ZNF749      | 0.0058 | 1.23 |
| Transmembrane protein 210                                                                                               | TMEM210     | 0.0047 | 1.23 |
| Serpin peptidase inhibitor, clade F (alpha-2 antiplasmin, pigm Zhang2013 ALT_ACCEPTOR, ALT_DONOR, coding, INTERNAL, int | SERPINF1    | 0.0071 | 1.23 |
| Insulin receptor substrate 2                                                                                            | IRS2        | 0.0012 | 1.23 |
| Family with sequence similarity 109, member A                                                                           | FAM109A     | 0.0084 | 1.22 |
| Methylthioribose-1-phosphate isomerase 1                                                                                | MRI1        | 0.0273 | 1.22 |
| Dipeptidyl-peptidase 3                                                                                                  | DPP3        | 0.0012 | 1.22 |
| Suppressor of IKBKE 1                                                                                                   | SIKE1       | 0.0202 | 1.22 |
| Vascular endothelial growth factor B                                                                                    | VEGFB       | 0.0260 | 1.22 |
| Cathepsin V                                                                                                             | CTSV        | 0.0121 | 1.22 |
| Rabphilin 3A-like (without C2 domains)                                                                                  | RPH3AL      | 0.0104 | 1.22 |
| Jeck2013 ANTISENSE, CDS, coding, INTERNAL, intronic, OVCODE                                                             | MYH9        | 0.0176 | 1.22 |
| SH3 and multiple ankyrin repeat domains 2                                                                               | SHANK2      | 0.0252 | 1.22 |
| Regulatory factor X, 1 (influences HLA class II expression)                                                             | RFX1        | 0.0041 | 1.22 |
| Microrna 1199                                                                                                           | MIR1199     | 0.0140 | 1.22 |
| Chemokine (C-X-C motif) ligand 1 (melanoma growth stimulating act                                                       | CXCL1       | 0.0162 | 1.22 |
| Potassium channel, voltage gated eag related subfamily H, memb                                                          | KCNH6       | 0.0161 | 1.22 |
| Ras homolog family member J                                                                                             | RHOJ        | 0.0067 | 1.22 |
| ALDH1L1 antisense RNA 1                                                                                                 | ALDH1L1-AS1 | 0.0361 | 1.22 |
| Cyclin-dependent kinase 6                                                                                               | CDK6        | 0.0018 | 1.22 |
| Oxysterol binding protein-like 2                                                                                        | OSBPL2      | 0.0006 | 1.22 |
| CD63 molecule                                                                                                           | CD63        | 0.0445 | 1.22 |
| G protein-coupled receptor 39                                                                                           | GPR39       | 0.0096 | 1.22 |
| Polymerase (DNA directed), lambda                                                                                       | POLL        | 0.0013 | 1.22 |
| Sphingomyelin phosphodiesterase 4, neutral membrane (neutral s                                                          | SMPD4       | 0.0415 | 1.22 |
| Kelch-like family member 29                                                                                             | KLHL29      | 0.0030 | 1.22 |
| Arginine vasopressin receptor 1A                                                                                        | AVPR1A      | 0.0131 | 1.22 |



|                                                                     |            |        |      |
|---------------------------------------------------------------------|------------|--------|------|
| CBP80                                                               | CTIF       | 0.0060 | 1.22 |
| ABO blood group (transferase A, alpha 1-3-N-acetylgalactosaminyltra | ABO        | 0.0102 | 1.22 |
| Transmembrane protein 160                                           | TMEM160    | 0.0365 | 1.22 |
| LIM and calponin homology domains 1                                 | LIMCH1     | 0.0308 | 1.22 |
| GINS complex subunit 3 (Psf3 homolog)                               | GINS3      | 0.0128 | 1.22 |
| Late endosomal                                                      | LAMTOR4    | 0.0120 | 1.22 |
| Ring finger protein 223                                             | RNF223     | 0.0137 | 1.22 |
| LY6                                                                 | LYPD6      | 0.0067 | 1.22 |
| Retinoic acid receptor responder (tazarotene induced) 2             | RARRES2    | 0.0059 | 1.22 |
| Phenylethanolamine N-methyltransferase                              | PNMT       | 0.0022 | 1.22 |
| Olfactory receptor, family 6, subfamily Q, member 1 (gene           | OR6Q1      | 0.0135 | 1.22 |
| Family with sequence similarity 131, member A                       | FAM131A    | 0.0098 | 1.22 |
| Natural killer cell granule protein 7                               | NKG7       | 0.0186 | 1.22 |
| RAD9 checkpoint clamp component A                                   | RAD9A      | 0.0404 | 1.21 |
| Transient receptor potential cation channel, subfamily M, member    | TRPM2      | 0.0103 | 1.21 |
| ARPC4-TLL3 readthrough                                              | ARPC4-TLL3 | 0.0096 | 1.21 |
| Protein kinase domain containing, cytoplasmic                       | PKDCC      | 0.0289 | 1.21 |
| Cytochrome c oxidase subunit viia polypeptide 1 (muscle)            | COX7A1     | 0.0266 | 1.21 |
| Latent transforming growth factor beta binding protein 2            | LTBP2      | 0.0344 | 1.21 |
| Carbonic anhydrase XI                                               | CA11       | 0.0327 | 1.21 |
| Chromosome 17 open reading frame 58                                 | C17orf58   | 0.0025 | 1.21 |
| Transmembrane protein 55A                                           | TMEM55A    | 0.0167 | 1.21 |
| Lin-7 homolog C (C. Elegans)                                        | LIN7C      | 0.0121 | 1.21 |
| Chromosome 9 open reading frame 62                                  | C9orf62    | 0.0016 | 1.21 |
| PDZ domain containing 4                                             | PDZD4      | 0.0018 | 1.21 |
| Mitogen-activated protein kinase kinase 7                           | MAP2K7     | 0.0089 | 1.21 |
| Serpin peptidase inhibitor, clade F (alpha-2 antiplasmin, p         | SERPINF2   | 0.0100 | 1.21 |
| Cold inducible RNA binding protein                                  | CIRBP      | 0.0405 | 1.21 |
| Thyroid peroxidase                                                  | TPO        | 0.0346 | 1.21 |
| Ribosomal protein S19 binding protein 1                             | RPS19BP1   | 0.0454 | 1.21 |

|                                                                   |                  |        |      |
|-------------------------------------------------------------------|------------------|--------|------|
| Undifferentiated embryonic cell transcription factor 1            | UTF1             | 0.0197 | 1.21 |
| Double homeobox 3                                                 | DUX3             | 0.0028 | 1.21 |
| Neurotrophin 4                                                    | NTF4             | 0.0079 | 1.21 |
| Cystatin B (stefin B)                                             | CSTB             | 0.0248 | 1.21 |
| Ribosomal protein L6                                              | RPL6             | 0.0053 | 1.21 |
| Transcription elongation factor B polypeptide 3C-like             | TCEB3CL          | 0.0363 | 1.21 |
| C-terminal binding protein 1                                      | CTBP1            | 0.0089 | 1.21 |
| Transmembrane 4 L six family member 5                             | TM4SF5           | 0.0163 | 1.21 |
| Autophagy related 16-like 2                                       | ATG16L2          | 0.0246 | 1.21 |
| Transport and golgi organization 6 homolog                        | TANGO6           | 0.0295 | 1.21 |
| Hes family bhlh transcription factor 7                            | HES7             | 0.0443 | 1.21 |
| Chromosome 22 open reading frame 29                               | C22orf29         | 0.0105 | 1.21 |
| V-set and immunoglobulin domain containing 8                      | VSIG8            | 0.0324 | 1.21 |
| Vasorin                                                           | VASN             | 0.0319 | 1.21 |
| Gasdermin C                                                       | GSDMC            | 0.0360 | 1.21 |
| Chromosome 9 open reading frame 170                               | C9orf170         | 0.0092 | 1.21 |
| G protein-coupled receptor 146                                    | GPR146           | 0.0284 | 1.21 |
| Ubiquitin-like with PHD and ring finger domains 2, E3 ubiquitin p | UHRF2            | 0.0128 | 1.21 |
| Zinc finger protein 585B                                          | ZNF585B          | 0.0262 | 1.21 |
| Proline rich 23A                                                  | PRR23A           | 0.0350 | 1.21 |
| Integrator complex subunit 5                                      | INTS5            | 0.0026 | 1.21 |
| Synaptosome associated protein 47kda                              | SNAP47           | 0.0229 | 1.21 |
| S100 calcium binding protein A3                                   | S100A3           | 0.0062 | 1.21 |
| Ubiquitin associated protein 1 like PR domain containing 10       | UBAP1L           | 0.0212 | 1.21 |
| Tumor suppressor candidate 1                                      | PRDM10           | 0.0095 | 1.21 |
| EP300 interacting inhibitor of differentiation 2                  | TUSC1            | 0.0095 | 1.21 |
| Cytochrome P450, family 26, subfamily C, polypeptide 1            | EID2             | 0.0059 | 1.20 |
| Proline dehydrogenase (oxidase) 1                                 | CYP26C1          | 0.0106 | 1.20 |
| NADH dehydrogenase (ubiquinone) complex I, assembly factor 3      | PRODH            | 0.0204 | 1.20 |
| TM4SF19-TCTEX1D2 readthrough (NMD candidate)                      | NDUFAF3          | 0.0312 | 1.20 |
| Pleckstrin 2                                                      | TM4SF19-TCTEX1D2 | 0.0020 | 1.20 |
| Jeck2013 ANTISENSE, CDS, coding,                                  | PLEK2            | 0.0019 | 1.20 |
|                                                                   | MEN1             | 0.0196 | 1.20 |

|                                                               |             |        |      |
|---------------------------------------------------------------|-------------|--------|------|
| INTERNAL, OVCODE, OVEXON b                                    |             |        |      |
| HECT domain containing E3 ubiquitin protein ligase 3          | HECTD3      | 0.0346 | 1.20 |
| Translocase of outer mitochondrial membrane 7 homolog (yeast) | TOMM7       | 0.0284 | 1.20 |
| Activating transcription factor 5                             | ATF5        | 0.0361 | 1.20 |
| Phosphoenolpyruvate carboxykinase 2 (mitochondrial)           | PCK2        | 0.0238 | 1.20 |
| MPV17 mitochondrial membrane protein-like 2                   | MPV17L2     | 0.0327 | 1.20 |
| UDP-glucose ceramide glucosyltransferase                      | UGCG        | 0.0224 | 1.20 |
| SCO1 cytochrome c oxidase assembly protein                    | SCO1        | 0.0478 | 1.20 |
| Long intergenic non-protein coding RNA 92                     | LINC00092   | 0.0293 | 1.20 |
| HGH1 homolog                                                  | HGH1        | 0.0201 | 1.20 |
| Transcript Identified by aceview, Entrez Gene ID(             | KLHDC4      | 0.0258 | 1.20 |
| Tripartite motif containing 68                                | TRIM68      | 0.0196 | 1.20 |
| Camp responsive element modulator                             | CREM        | 0.0133 | 1.20 |
| Solute carrier family 22, member 17                           | SLC22A17    | 0.0257 | 1.20 |
| SYS1-DBNDD2 readthrough (NMD candidate)                       | SYS1-DBNDD2 | 0.0145 | 1.20 |
| Acyl-coa thioesterase 7                                       | ACOT7       | 0.0285 | 1.20 |
| Tubulin, gamma 1                                              | TUBG1       | 0.0057 | 1.20 |
| HAUS augmin like complex subunit 3                            | HAUS3       | 0.0049 | 1.20 |
| LY6                                                           | LYPD3       | 0.0312 | 1.20 |
| PRAME family member 7                                         | PRAMEF7     | 0.0055 | 1.20 |
| BAH domain and coiled-coil containing 1                       | BAHCC1      | 0.0148 | 1.20 |
| Ephrin-B1                                                     | EFNB1       | 0.0106 | 1.20 |
| Ligase III, DNA, ATP-dependent                                | LIG3        | 0.0302 | 1.20 |
| V-myb avian myeloblastosis viral oncogene homolog-like 2      | MYBL2       | 0.0245 | 1.20 |
| Lactate dehydrogenase D                                       | LDHD        | 0.0181 | 1.20 |
| Serine                                                        | SRSF4       | 0.0380 | 1.20 |
| Adhesion regulating molecule 1                                | ADRM1       | 0.0279 | 1.20 |
| Potassium channel, two pore domain subfamily K, member 5      | KCNK5       | 0.0006 | 1.20 |
| Rho                                                           | ARHGEF2     | 0.0286 | 1.20 |
| Midnolin                                                      | MIDN        | 0.0479 | 1.20 |
| Forkhead box C1                                               | FOXC1       | 0.0121 | 1.20 |
| Megakaryoblastic leukemia (translocation) 1                   | MKL1        | 0.0131 | 1.20 |
| Fatty acid synthase                                           | FASN        | 0.0070 | 1.20 |

|                                                                |          |        |      |
|----------------------------------------------------------------|----------|--------|------|
| Mitogen-activated protein kinase kinase 3                      | MAP3K3   | 0.0338 | 1.20 |
| Ankyrin repeat domain 29                                       | ANKRD29  | 0.0040 | 1.20 |
| Nucleolar complex associated 4 homolog                         | NOC4L    | 0.0273 | 1.20 |
| MAP7 domain containing 2                                       | MAP7D2   | 0.0331 | 1.20 |
| Nucleobindin 1                                                 | NUCB1    | 0.0186 | 1.20 |
| NFKB inhibitor interacting Ras-like 2                          | NKIRAS2  | 0.0382 | 1.20 |
| STIP1 homology and U-box containing protein 1, E3 ubiquitin pr | STUB1    | 0.0358 | 1.20 |
| Synaptosome associated protein 91kda                           | SNAP91   | 0.0008 | 1.20 |
| Zinc finger CCCH-type containing 7B                            | ZC3H7B   | 0.0403 | 1.19 |
| Rho gtpase activating protein 19                               | ARHGAP19 | 0.0223 | 1.19 |
| Transcript Identified by aceview, Entrez Gene ID(s) 158219     | TTC39B   | 0.0228 | 1.19 |
| Neurensin 2                                                    | NRSN2    | 0.0040 | 1.19 |
| Mitochondrial ribosomal protein L55                            | MRPL55   | 0.0471 | 1.19 |
| C1q and tumor necrosis factor related protein 4                | C1QTNF4  | 0.0388 | 1.19 |
| NK2 homeobox 8                                                 | NKX2-8   | 0.0439 | 1.19 |
| Wilms tumor 1 interacting protein                              | WTIP     | 0.0423 | 1.19 |
| Myozenin 3                                                     | MYOZ3    | 0.0218 | 1.19 |
| Syncoilin, intermediate filament protein                       | SYNC     | 0.0363 | 1.19 |
| Aprataxin                                                      | APTX     | 0.0194 | 1.19 |
| Mortality factor 4 like 2                                      | MORF4L2  | 0.0123 | 1.19 |
| Calcium                                                        | CAMKK2   | 0.0193 | 1.19 |
| Sex comb on midleg-like 4 (Drosophila)                         | SCML4    | 0.0440 | 1.19 |
| F11 antisense RNA 1                                            | F11-AS1  | 0.0217 | 1.19 |
| Memczak2013 ANTISENSE, CDS, coding, INTERNAL best transcri     | USP9X    | 0.0472 | 1.19 |
| Breast cancer metastasis suppressor 1                          | BRMS1    | 0.0026 | 1.19 |
| Msh homeobox 1                                                 | MSX1     | 0.0391 | 1.19 |
| IGF like family member 3                                       | IGFL3    | 0.0394 | 1.19 |
| Major histocompatibility complex, class II, DM alpha           | HLA-DMA  | 0.0231 | 1.19 |
| Transmembrane protein 86B                                      | TMEM86B  | 0.0091 | 1.19 |
| Family with sequence similarity 120A                           | FAM120A  | 0.0289 | 1.19 |
| Methyltransferase like 13                                      | METTL13  | 0.0297 | 1.19 |
| Coiled-coil domain containing 159                              | CCDC159  | 0.0262 | 1.19 |
| Thyroid hormone responsive                                     | THRSP    | 0.0367 | 1.19 |
| Collagen, type I, alpha 1                                      | COL1A1   | 0.0215 | 1.19 |

|                                                                  |           |        |      |
|------------------------------------------------------------------|-----------|--------|------|
| CDK2-associated, cullin domain 1                                 | CACUL1    | 0.0421 | 1.19 |
| Zinc finger protein 44                                           | ZNF44     | 0.0304 | 1.19 |
| Chromosome 20 open reading frame 173                             | C20orf173 | 0.0019 | 1.19 |
| Ribosomal protein S5                                             | RPS5      | 0.0060 | 1.19 |
| Nuclear receptor subfamily 2, group C, member 2                  | NR2C2     | 0.0328 | 1.19 |
| N-deacetylase                                                    | NDST2     | 0.0191 | 1.19 |
| SIX homeobox 2                                                   | SIX2      | 0.0220 | 1.19 |
| EPH receptor B6                                                  | EPHB6     | 0.0141 | 1.19 |
| Forkhead-associated (FHA) phosphopeptide binding domain 1        | FHAD1     | 0.0143 | 1.19 |
| EXOC3 antisense RNA 1                                            | EXOC3-AS1 | 0.0094 | 1.19 |
| Folylpolyglutamate synthase                                      | FPGS      | 0.0123 | 1.19 |
| Parkinson disease 7 domain containing 1                          | PDDC1     | 0.0219 | 1.19 |
| Mitochondrial ribosomal protein S14                              | MRPS14    | 0.0017 | 1.19 |
| Purinergic receptor P2X, ligand gated ion channel, 3             | P2RX3     | 0.0117 | 1.19 |
| CREB                                                             | CREBZF    | 0.0201 | 1.19 |
| Zinc finger protein 814                                          | ZNF814    | 0.0403 | 1.19 |
| Junctophilin 2                                                   | JPH2      | 0.0496 | 1.19 |
| Memczak2013 ANTISENSE, coding, INTERNAL, intronic best t         | NDUFA10   | 0.0137 | 1.19 |
| Olfactory receptor, family 6, subfamily B, member 3              | OR6B3     | 0.0311 | 1.19 |
| Protein tyrosine phosphatase, receptor type, C-associated prote  | PTPRCAP   | 0.0118 | 1.19 |
| Proliferating cell nuclear antigen                               | PCNA      | 0.0120 | 1.19 |
| Lectin, galactoside-binding, soluble, 7B                         | LGALS7B   | 0.0255 | 1.19 |
| Integrin alpha 4                                                 | ITGA4     | 0.0319 | 1.19 |
| UDP-glcnac:betagal beta-1,3-N-acetylglucosaminyltransferase 6    | B3GNT6    | 0.0206 | 1.19 |
| Pleckstrin homology domain containing, family B (evectins) m     | PLEKHB2   | 0.0179 | 1.19 |
| Synthetic construct Homo sapiens clone IMAGE:100062553, MGC:1905 | BAGE5     | 0.0401 | 1.19 |
| Leucine rich repeat containing 4B                                | LRRC4B    | 0.0433 | 1.19 |
| Spermatogenesis associated 2                                     | SPATA2    | 0.0291 | 1.19 |
| Mediator complex subunit 9                                       | MED9      | 0.0384 | 1.19 |
| Trans-golgi network vesicle protein 23 homolog B (S. Cerevisiae) | TVP23B    | 0.0212 | 1.18 |
| Apolipoprotein B mrna editing enzyme, catalytic polypeptide-lik  | APOBEC2   | 0.0453 | 1.18 |
| Phospholipid phosphatase 6                                       | PLPP6     | 0.0161 | 1.18 |

|                                                                |           |        |      |
|----------------------------------------------------------------|-----------|--------|------|
| Apolipoprotein B mrna editing enzyme, catalytic polypeptide    | APOBEC3H  | 0.0184 | 1.18 |
| Kinesin family member 7                                        | KIF7      | 0.0303 | 1.18 |
| RAB26, member RAS oncogene family                              | RAB26     | 0.0439 | 1.18 |
| Serine                                                         | SRSF8     | 0.0122 | 1.18 |
| High mobility group AT-hook 2                                  | HMGA2     | 0.0266 | 1.18 |
| Family with sequence similarity 212, member B                  | FAM212B   | 0.0418 | 1.18 |
| 5-hydroxytryptamine (serotonin) receptor 1B, G protein-coupled | HTR1B     | 0.0292 | 1.18 |
| Transmembrane protein 52B                                      | TMEM52B   | 0.0265 | 1.18 |
| Tumor necrosis factor receptor superfamily, member 8           | TNFRSF8   | 0.0188 | 1.18 |
| Microtubule associated serine                                  | MAST1     | 0.0320 | 1.18 |
| Heterogeneous nuclear ribonucleoprotein A3                     | HNRNPA3   | 0.0150 | 1.18 |
| Glucocorticoid modulatory element binding protein 2            | GMEB2     | 0.0318 | 1.18 |
| Papilin, proteoglycan-like sulfated glycoprotein               | PAPLN     | 0.0261 | 1.18 |
| Mitochondrial ribosome-associated gtpase 2                     | MTG2      | 0.0443 | 1.18 |
| Gliomedin                                                      | GLDN      | 0.0318 | 1.18 |
| Phosphoribosyl pyrophosphate synthetase 2                      | PRPS2     | 0.0489 | 1.18 |
| DAB2 interacting protein                                       | DAB2IP    | 0.0334 | 1.18 |
| Solute carrier family 52 (riboflavin transporter), member 1    | SLC52A1   | 0.0238 | 1.18 |
| Poly(A) binding protein, cytoplasmic 3                         | PABPC3    | 0.0171 | 1.18 |
| Nuclear receptor interacting protein 2                         | NRIP2     | 0.0074 | 1.18 |
| Serine                                                         | SRRM3     | 0.0351 | 1.18 |
| Trophinin associated protein                                   | TROAP     | 0.0484 | 1.18 |
| Mastermind-like transcriptional coactivator 1                  | MAML1     | 0.0292 | 1.18 |
| Gap junction protein beta 5                                    | GJB5      | 0.0203 | 1.18 |
| Transmembrane protein 216                                      | TMEM216   | 0.0452 | 1.18 |
| S-antigen; retina and pineal gland (arrestin)                  | SAG       | 0.0047 | 1.18 |
| Major histocompatibility complex, class II, DQ alpha           | HLA-DQA2  | 0.0121 | 1.18 |
| Transcript Identified by aceview, Entrez Gene ID(s)            | HCRP1     | 0.0026 | 1.18 |
| RAB11 family interacting protein 5 (class I)                   | RAB11FIP5 | 0.0302 | 1.18 |

|                                                          |             |        |      |
|----------------------------------------------------------|-------------|--------|------|
| Sulfotransferase family 2B member 1                      | SULT2B1     | 0.0249 | 1.18 |
| Igln family member 5                                     | IGLON5      | 0.0345 | 1.18 |
| Serine dehydratase-like                                  | SDSL        | 0.0296 | 1.18 |
| Laminin, gamma 3                                         | LAMC3       | 0.0319 | 1.18 |
| IMP3, U3 small nucleolar ribonucleoprotein               | IMP3        | 0.0075 | 1.18 |
| Acyl-coa thioesterase 2                                  | ACOT2       | 0.0286 | 1.18 |
| Proline-rich nuclear receptor coactivator 2              | PNRC2       | 0.0478 | 1.18 |
| Inhibitor of CDK, cyclin A1 interacting protein 1        | INCA1       | 0.0032 | 1.18 |
| Cadherin 3, type 1, P-cadherin (placental)               | CDH3        | 0.0335 | 1.18 |
| Rho guanine nucleotide exchange factor 19                | ARHGEF19    | 0.0056 | 1.18 |
| Sushi domain containing 2                                | SUSD2       | 0.0327 | 1.18 |
| PALM2-AKAP2 readthrough                                  | PALM2-AKAP2 | 0.0455 | 1.18 |
| Tetraspanin 31                                           | TSPAN31     | 0.0290 | 1.18 |
| Lysophosphatidic acid receptor 3                         | LPAR3       | 0.0123 | 1.18 |
| Valyl-trna synthetase 2, mitochondrial                   | VAR2        | 0.0010 | 1.18 |
| Transmembrane protein 189                                | TMEM189     | 0.0420 | 1.18 |
| WD repeat and FYVE domain containing 1                   | WDFY1       | 0.0224 | 1.18 |
| Sterol regulatory element binding transcription factor 1 | SREBF1      | 0.0457 | 1.18 |
| Phosphorylase, glycogen, muscle                          | PYGM        | 0.0239 | 1.18 |
| K(lysine) acetyltransferase 6B                           | KAT6B       | 0.0160 | 1.18 |
| V-set and immunoglobulin domain containing 1             | VSIG1       | 0.0431 | 1.18 |
| Ribosomal protein S6 kinase, 90kda, polypeptide 1        | RPS6KA1     | 0.0384 | 1.18 |
| Eukaryotic translation initiation factor 4H              | EIF4H       | 0.0224 | 1.18 |
| Peptidylprolyl isomerase F                               | PPIF        | 0.0145 | 1.18 |
| Naked cuticle homolog 2 (Drosophila)                     | NKD2        | 0.0190 | 1.18 |
| Ribosomal protein S25                                    | RPS25       | 0.0194 | 1.18 |
| Tenascin XB                                              | TNXB        | 0.0367 | 1.18 |
| Protein phosphatase 1, regulatory subunit 3D             | PPP1R3D     | 0.0136 | 1.18 |
| Insulin like growth factor binding protein-like 1        | IGFBPL1     | 0.0134 | 1.18 |
| NK1 homeobox 2                                           | NKX1-2      | 0.0340 | 1.18 |
| Proteasome 26S subunit, non-atpase 8                     | PSMD8       | 0.0197 | 1.18 |

|                                                                  |          |        |      |
|------------------------------------------------------------------|----------|--------|------|
| Coiled-coil domain containing 64                                 | CCDC64   | 0.0479 | 1.18 |
| Translocase of inner mitochondrial membrane 13 homolog (yeast)   | TIMM13   | 0.0277 | 1.18 |
| Transcript Identified by aceview, Entrez Gene ID(s)              | CYB5D2   | 0.0086 | 1.18 |
| Transcription elongation factor B polypeptide 3C (elongin A3)    | TCEB3C   | 0.0445 | 1.18 |
| Dehydrogenase                                                    | DHRS9    | 0.0039 | 1.18 |
| Hepcidin antimicrobial peptide                                   | HAMP     | 0.0328 | 1.18 |
| KH domain containing, RNA binding, signal transduction associat  | KHDRBS2  | 0.0320 | 1.18 |
| Chromosome 3 open reading frame 84                               | C3orf84  | 0.0340 | 1.18 |
| Lysine (K)-specific demethylase 5D                               | KDM5D    | 0.0160 | 1.18 |
| Mucolipin 1                                                      | MCOLN1   | 0.0358 | 1.18 |
| Kinesin light chain 2                                            | KLC2     | 0.0452 | 1.18 |
| Cadherin 12, type 2 (N-cadherin 2)                               | CDH12    | 0.0272 | 1.18 |
| X-prolyl aminopeptidase (aminopeptidase P) 2, membrane-bound     | XPNPEP2  | 0.0215 | 1.18 |
| G protein-coupled receptor 135                                   | GPR135   | 0.0078 | 1.18 |
| Actin binding LIM protein family, member 2                       | ABLIM2   | 0.0323 | 1.18 |
| Peroxisomal biogenesis factor 11 alpha                           | PEX11A   | 0.0274 | 1.18 |
| Cell division cycle 26                                           | CDC26    | 0.0241 | 1.17 |
| Proline rich 25                                                  | PRR25    | 0.0147 | 1.17 |
| Contactin associated protein 1                                   | CNTNAP1  | 0.0088 | 1.17 |
| Keratin associated protein 5-9                                   | KRTAP5-9 | 0.0218 | 1.17 |
| Ribosomal protein L23                                            | RPL23    | 0.0294 | 1.17 |
| Collagen, type IV, alpha 2                                       | COL4A2   | 0.0217 | 1.17 |
| Transcription factor AP-2 epsilon (activating enhancer binding p | TFAP2E   | 0.0220 | 1.17 |
| NME                                                              | NME3     | 0.0444 | 1.17 |
| Epithelial membrane protein 3                                    | EMP3     | 0.0130 | 1.17 |
| Gametogenetin binding protein 2                                  | GGNBP2   | 0.0138 | 1.17 |
| Cancer                                                           | CT83     | 0.0280 | 1.17 |
| Potassium channel, voltage gated KQT-like subfamily Q, member 2  | KCNQ2    | 0.0252 | 1.17 |
| Transmembrane protein 43                                         | TMEM43   | 0.0282 | 1.17 |
| SEC22 homolog C, vesicle trafficking protein                     | SEC22C   | 0.0012 | 1.17 |
| S-antigen; retina and pineal gland (arrestin)                    | SAG      | 0.0123 | 1.17 |
| Polymerase (RNA) III (DNA directed) polypeptide D, 44kda         | POLR3D   | 0.0318 | 1.17 |
| Chromosome 17 open reading                                       | C17orf67 | 0.0364 | 1.17 |



|                                                                 |             |        |      |
|-----------------------------------------------------------------|-------------|--------|------|
| frame 67                                                        |             |        |      |
| Otoferlin                                                       | OTOF        | 0.0106 | 1.17 |
| ZNF252P antisense RNA 1                                         | ZNF252P-AS1 | 0.0360 | 1.17 |
| Lymphocyte antigen 6 complex,<br>locus G6C                      | LY6G6C      | 0.0172 | 1.17 |
| LIM domain only 4                                               | LMO4        | 0.0489 | 1.17 |
| Solute carrier family 27 (fatty acid<br>transporter), member 6  | SLC27A6     | 0.0068 | 1.17 |
| Chloride intracellular channel 1                                | CLIC1       | 0.0193 | 1.17 |
| EPM2A (laforin) interacting protein<br>1                        | EPM2AIP1    | 0.0175 | 1.17 |
| Vitamin K epoxide reductase<br>complex subunit 1 like 1         | VKORC1L1    | 0.0344 | 1.17 |
| Coiled-coil domain containing 17                                | CCDC17      | 0.0156 | 1.17 |
| Cell division cycle associated 5                                | CDCA5       | 0.0464 | 1.17 |
| Dnaj (Hsp40) homolog, subfamily B,<br>member 1                  | DNAJB1      | 0.0390 | 1.17 |
| Zinc finger protein 321, pseudogene                             | ZNF321P     | 0.0365 | 1.17 |
| Phospholipase C, beta 2                                         | PLCB2       | 0.0244 | 1.17 |
| Rab interacting lysosomal protein-<br>like 1                    | RILPL1      | 0.0115 | 1.17 |
| Heat shock 70kda protein 14                                     | HSPA14      | 0.0437 | 1.17 |
| Mitochondrial ribosomal protein<br>S26                          | MRPS26      | 0.0149 | 1.17 |
| Dishevelled segment polarity<br>protein 3                       | DVL3        | 0.0347 | 1.17 |
| Roundabout guidance receptor 3                                  | ROBO3       | 0.0184 | 1.17 |
| Voltage-dependent anion channel 1                               | VDAC1       | 0.0206 | 1.17 |
| Chemokine (C-C motif) ligand 26                                 | CCL26       | 0.0264 | 1.17 |
| Transmembrane protein 237                                       | TMEM237     | 0.0426 | 1.17 |
| Dipeptidyl-peptidase 6                                          | DPP6        | 0.0088 | 1.17 |
| BCL2-like 14 (apoptosis facilitator)                            | BCL2L14     | 0.0012 | 1.17 |
| Tryptase gamma 1                                                | TPSG1       | 0.0165 | 1.17 |
| Thyrotrophic embryonic factor                                   | TEF         | 0.0221 | 1.17 |
| Solute carrier family 6 (neutral<br>amino acid transporter), me | SLC6A19     | 0.0401 | 1.17 |
| Tripartite motif containing 45                                  | TRIM45      | 0.0306 | 1.17 |
| Adhesion G protein-coupled<br>receptor G3                       | ADGRG3      | 0.0179 | 1.17 |
| Iroquois homeobox 2                                             | IRX2        | 0.0357 | 1.17 |
| Prolactin releasing hormone                                     | PRLH        | 0.0388 | 1.17 |
| Ewing tumor-associated antigen 1                                | ETAA1       | 0.0233 | 1.17 |
| Ribosomal protein L7a                                           | RPL7A       | 0.0078 | 1.17 |
| CD209 molecule                                                  | CD209       | 0.0310 | 1.17 |
| Atpase, H+ transporting, lysosomal<br>accessory protein 1       | ATP6AP1     | 0.0448 | 1.17 |
| Chromosome X open reading frame                                 | CXorf40A    | 0.0180 | 1.17 |

## 40A

|                                                                  |            |        |      |
|------------------------------------------------------------------|------------|--------|------|
| Family with sequence similarity 197, Y-linked, member            | FAM197Y1   | 0.0067 | 1.17 |
| Purinergic receptor P2X, ligand gated ion channel, 6             | P2RX6      | 0.0288 | 1.17 |
| Neurofibromin 2 (merlin)                                         | NF2        | 0.0046 | 1.17 |
| ST6 (alpha-N-acetyl-neuraminyl-2,3-beta-galactosyl-1,3)-N-ac     | ST6GALNAC2 | 0.0319 | 1.17 |
| Macrophage erythroblast attacher                                 | MAEA       | 0.0295 | 1.17 |
| Zinc finger CCCH-type containing 8                               | ZC3H8      | 0.0229 | 1.17 |
| Double homeobox 4 like 7                                         | DUX4L7     | 0.0181 | 1.17 |
| Chromosome 19 open reading frame 60                              | C19orf60   | 0.0370 | 1.17 |
| Solute carrier family 47 (multidrug and toxin extrusion), membe  | SLC47A1    | 0.0226 | 1.17 |
| Leucine rich repeat containing 55                                | LRRC55     | 0.0249 | 1.17 |
| Cytokine receptor-like factor 2                                  | CRLF2      | 0.0338 | 1.17 |
| Zinc finger protein 764                                          | ZNF764     | 0.0290 | 1.17 |
| PRAME family member 25                                           | PRAMEF25   | 0.0335 | 1.17 |
| Memczak2013 ANTISENSE, CDS, coding, INTERNAL best transcript     | MPO        | 0.0136 | 1.16 |
| Glutamate decarboxylase like 1                                   | GADL1      | 0.0075 | 1.16 |
| CKLF-like MARVEL transmembrane domain containing 5               | CMTM5      | 0.0134 | 1.16 |
| Von Willebrand factor A domain containing 5B1                    | VWA5B1     | 0.0454 | 1.16 |
| Tetratricopeptide repeat domain 34                               | TTC34      | 0.0401 | 1.16 |
| Short stature homeobox                                           | SHOX       | 0.0422 | 1.16 |
| Chromosome 17 open reading frame 89                              | C17orf89   | 0.0232 | 1.16 |
| Regulator of G-protein signaling 3                               | RGS3       | 0.0289 | 1.16 |
| Hedgehog acyltransferase                                         | HHAT       | 0.0094 | 1.16 |
| Cytidine monophosphate (UMP-CMP) kinase 1, cytosolic             | CMPK1      | 0.0152 | 1.16 |
| Solute carrier family 7 (amino acid transporter light chain, L s | SLC7A5     | 0.0273 | 1.16 |
| Peroxisomal biogenesis factor 12                                 | PEX12      | 0.0024 | 1.16 |
| Contactin associated protein-like 2                              | CNTNAP2    | 0.0497 | 1.16 |
| Tyrosyl-trna synthetase 2, mitochondrial                         | YARS2      | 0.0005 | 1.16 |
| Like-glycosyltransferase                                         | LARGE      | 0.0211 | 1.16 |
| Interferon, lambda 4 (gene                                       | IFNL4      | 0.0146 | 1.16 |
| N-acetyltransferase 14 (GCN5-related, putative)                  | NAT14      | 0.0186 | 1.16 |
| Proline, glutamate and leucine rich protein 1                    | PELP1      | 0.0437 | 1.16 |
| Zinc finger protein 547                                          | ZNF547     | 0.0069 | 1.16 |

|                                                                                                            |                      |                  |              |
|------------------------------------------------------------------------------------------------------------|----------------------|------------------|--------------|
| Zinc finger protein 114                                                                                    | ZNF114               | 0.0232           | 1.16         |
| Small nuclear ribonucleoprotein polypeptides B and B1                                                      | SNRPB                | 0.0402           | 1.16         |
| Stromal cell-derived factor 2-like 1                                                                       | SDF2L1               | 0.0167           | 1.16         |
| Leukemia NUP98 fusion partner 1                                                                            | LNP1                 | 0.0226           | 1.16         |
| Carcinoembryonic antigen-related cell adhesion molecule 18                                                 | CEACAM18             | 0.0366           | 1.16         |
| Inosine triphosphatase (nucleoside triphosphate pyrophosphatase                                            | ITPA                 | 0.0330           | 1.16         |
| Solute carrier family 45, member 4                                                                         | SLC45A4              | 0.0441           | 1.16         |
| Peroxisome proliferator-activated receptor delta                                                           | PPARD                | 0.0218           | 1.16         |
| Homo sapiens similar to testis specific protein, Y-linked 1, Family with sequence similarity 153, member A | LOC728395<br>FAM153A | 0.0254<br>0.0111 | 1.16<br>1.16 |
| Arrestin, beta 2                                                                                           | ARRB2                | 0.0498           | 1.16         |
| Rho gtpase activating protein 11B                                                                          | ARHGAP11B            | 0.0458           | 1.16         |
| Chromosome 6 open reading frame 120                                                                        | C6orf120             | 0.0294           | 1.16         |
| Peroxisomal biogenesis factor 19                                                                           | PEX19                | 0.0156           | 1.16         |
| SPT20 homolog, SAGA complex component-like 2                                                               | SUPT20HL2            | 0.0267           | 1.16         |
| Growth factor receptor bound protein 7                                                                     | GRB7                 | 0.0303           | 1.16         |
| Chromosome 14 open reading frame 119                                                                       | C14orf119            | 0.0204           | 1.16         |
| Diacylglycerol lipase, beta                                                                                | DAGLB                | 0.0131           | 1.16         |
| Mitochondrial ribosomal protein S18B                                                                       | MRPS18B              | 0.0259           | 1.16         |
| Crystallin gamma D                                                                                         | CRYGD                | 0.0198           | 1.16         |
| SHC (Src homology 2 domain containing) transforming protein 2                                              | SHC2                 | 0.0337           | 1.16         |
| Chloride channel, voltage-sensitive Ka                                                                     | CLCNKA               | 0.0247           | 1.16         |
| Olfactory marker protein                                                                                   | OMP                  | 0.0310           | 1.16         |
| Src-related kinase lacking C-terminal regulatory tyrosine and N-te                                         | SRMS                 | 0.0206           | 1.16         |
| HKR1, GLI-Kruppel zinc finger family member                                                                | HKR1                 | 0.0257           | 1.16         |
| Dystrobrevin binding protein 1                                                                             | DTNBP1               | 0.0151           | 1.16         |
| Coxsackie virus and adenovirus receptor                                                                    | CXADR                | 0.0023           | 1.16         |
| Ataxin 10                                                                                                  | ATXN10               | 0.0426           | 1.16         |
| Chromosome 14 open reading frame 169                                                                       | C14orf169            | 0.0099           | 1.16         |
| SMAD family member 9                                                                                       | SMAD9                | 0.0048           | 1.16         |

|                                                              |            |        |      |
|--------------------------------------------------------------|------------|--------|------|
| MRGPRG antisense RNA 1                                       | MRGPRG-AS1 | 0.0385 | 1.16 |
| Chromosome 15 open reading frame 54                          | C15orf54   | 0.0389 | 1.16 |
| Calmodulin binding transcription activator 1                 | CAMTA1     | 0.0481 | 1.16 |
| SEC31 homolog B, COPII coat complex component                | SEC31B     | 0.0099 | 1.16 |
| Proline rich 22                                              | PRR22      | 0.0390 | 1.16 |
| Chromosome 19 open reading frame 73                          | C19orf73   | 0.0433 | 1.16 |
| Zinc finger, FYVE domain containing 19                       | ZFYVE19    | 0.0284 | 1.15 |
| Centrosomal protein 135kda                                   | CEP135     | 0.0422 | 1.15 |
| Kinesin light chain 3                                        | KLC3       | 0.0339 | 1.15 |
| Olfactory receptor, family 2, subfamily T, member 1          | OR2T1      | 0.0321 | 1.15 |
| Bladder cancer associated protein                            | BLCAP      | 0.0494 | 1.15 |
| Coiled-coil domain containing 125                            | CCDC125    | 0.0198 | 1.15 |
| Lysosomal protein transmembrane 5                            | LAPTM5     | 0.0128 | 1.15 |
| Carbohydrate (N-acetylglucosamine-6-O) sulfotransferase 2    | CHST2      | 0.0218 | 1.15 |
| SAGA complex associated factor 29 pseudogene                 | LOC388242  | 0.0216 | 1.15 |
| Aldo-keto reductase family 7-like (gene)                     | AKR7L      | 0.0316 | 1.15 |
| Desert hedgehog                                              | DHH        | 0.0434 | 1.15 |
| Follistatin-like 4                                           | FSTL4      | 0.0416 | 1.15 |
| Chromosome 10 open reading frame 82                          | C10orf82   | 0.0319 | 1.15 |
| Family with sequence similarity 124 member A                 | FAM124A    | 0.0147 | 1.15 |
| Zinc finger protein 780A                                     | ZNF780A    | 0.0463 | 1.15 |
| Calcium channel, voltage-dependent, L type, alpha 1S subunit | CACNA1S    | 0.0357 | 1.15 |
| Transmembrane protein 63C                                    | TMEM63C    | 0.0130 | 1.15 |
| Family with sequence similarity 26, member F                 | FAM26F     | 0.0372 | 1.15 |
| Transmembrane protein 183B                                   | TMEM183B   | 0.0208 | 1.15 |
| Dopamine receptor D5                                         | DRD5       | 0.0319 | 1.15 |
| BCL2 binding component 3                                     | BBC3       | 0.0304 | 1.15 |
| Apoptotic chromatin condensation inducer 1                   | ACIN1      | 0.0118 | 1.15 |
| Estrogen-related receptor alpha                              | ESRRA      | 0.0287 | 1.15 |
| CXXC finger protein 5                                        | CXXC5      | 0.0218 | 1.15 |
| Dedicator of cytokinesis 10                                  | DOCK10     | 0.0071 | 1.15 |
| Solute carrier family 6                                      | SLC6A4     | 0.0316 | 1.15 |

|                                                                          |           |        |      |
|--------------------------------------------------------------------------|-----------|--------|------|
| (neurotransmitter transporter),<br>member 4                              |           |        |      |
| Perilipin 5                                                              | PLIN5     | 0.0346 | 1.15 |
| Mitogen-activated protein kinase 3                                       | MAPK3     | 0.0410 | 1.15 |
| Solute carrier family 2 (facilitated<br>glucose transporter), membe      | SLC2A4    | 0.0370 | 1.15 |
| Tumor necrosis factor receptor<br>superfamily, member 10c, decoy         | TNFRSF10C | 0.0197 | 1.15 |
| Chitinase 3-like 1 (cartilage<br>glycoprotein-39)                        | CHI3L1    | 0.0472 | 1.15 |
| Xeroderma pigmentosum,<br>complementation group C                        | XPC       | 0.0164 | 1.15 |
| Phosphoserine phosphatase                                                | PSPH      | 0.0079 | 1.15 |
| Interleukin 36, gamma                                                    | IL36G     | 0.0337 | 1.15 |
| Retinoid X receptor alpha                                                | RXRA      | 0.0337 | 1.15 |
| Ferredoxin 1                                                             | FDX1      | 0.0234 | 1.15 |
| Ras homolog family member Q                                              | RHOQ      | 0.0014 | 1.15 |
| Solute carrier family 9, subfamily A<br>(NHE3, cation proton anti        | SLC9A3R1  | 0.0500 | 1.15 |
| Pleckstrin homology domain<br>containing, family G (with rhogef          | PLEKHG6   | 0.0114 | 1.15 |
| Synaptogyrin 4                                                           | SYNGR4    | 0.0413 | 1.15 |
| Par-3 family cell polarity regulator<br>beta                             | PARD3B    | 0.0067 | 1.15 |
| CWC15 spliceosome-associated<br>protein                                  | CWC15     | 0.0487 | 1.15 |
| JRK-like                                                                 | JRKL      | 0.0319 | 1.15 |
| Misshapen-like kinase 1                                                  | MINK1     | 0.0247 | 1.15 |
| LSM6 homolog, U6 small nuclear<br>RNA and mrna degradation<br>associated | LSM6      | 0.0315 | 1.15 |
| Crystallin beta B2                                                       | CRYBB2    | 0.0391 | 1.15 |
| Coatomer protein complex subunit<br>zeta 2                               | COPZ2     | 0.0225 | 1.15 |
| Karyopherin alpha 4 (importin alpha<br>3)                                | KPNA4     | 0.0414 | 1.15 |
| Sirtuin 6                                                                | SIRT6     | 0.0417 | 1.15 |
| Chromosome 12 open reading<br>frame 71                                   | C12orf71  | 0.0342 | 1.15 |
| Steroidogenic acute regulatory<br>protein                                | STAR      | 0.0224 | 1.15 |
| NSE1 homolog, SMC5-SMC6<br>complex component                             | NSMCE1    | 0.0398 | 1.15 |
| LEM domain containing 3                                                  | LEMD3     | 0.0429 | 1.15 |
| KIAA1671                                                                 | KIAA1671  | 0.0296 | 1.15 |
| Absent in melanoma 1-like                                                | AIM1L     | 0.0384 | 1.15 |
| Transglutaminase 4                                                       | TGM4      | 0.0312 | 1.15 |

|                                                       |          |        |      |
|-------------------------------------------------------|----------|--------|------|
| DSN1 homolog, MIS12 kinetochore complex component     | DSN1     | 0.0238 | 1.15 |
| KIAA0355                                              | KIAA0355 | 0.0191 | 1.15 |
| Coiled-coil domain containing 162, pseudogene         | CCDC162P | 0.0343 | 1.15 |
| Armadillo repeat containing, X-linked 2               | ARMCX2   | 0.0217 | 1.15 |
| Arrestin domain containing 2                          | ARRDC2   | 0.0316 | 1.14 |
| Solute carrier family 22, member 24                   | SLC22A24 | 0.0415 | 1.14 |
| Intelectin 2                                          | ITLN2    | 0.0097 | 1.14 |
| Ras association (ralgds                               | RASSF3   | 0.0259 | 1.14 |
| Transcript Identified by aceview, Entrez Gene ID(s) 5 | PTK2     | 0.0271 | 1.14 |
| Centrosome and spindle pole associated protein 1      | CSPP1    | 0.0342 | 1.14 |
| Heparin-binding EGF-like growth factor                | HBEGF    | 0.0420 | 1.14 |
| Methyl-cpg binding domain protein 1                   | MBD1     | 0.0297 | 1.14 |
| Elongation factor RNA polymerase II-like 3            | ELL3     | 0.0479 | 1.14 |
| Methyltransferase like 16                             | METTL16  | 0.0246 | 1.14 |
| WD repeat domain 83 opposite strand                   | WDR83OS  | 0.0463 | 1.14 |
| Sad1 and UNC84 domain containing 2                    | SUN2     | 0.0305 | 1.14 |
| Death effector domain containing 2                    | DEDD2    | 0.0254 | 1.14 |
| TSEN15 trna splicing endonuclease subunit             | TSEN15   | 0.0291 | 1.14 |
| Calcium binding protein 4                             | CABP4    | 0.0212 | 1.14 |
| Autoimmune regulator                                  | AIRE     | 0.0220 | 1.14 |
| Transcription factor 20 (AR1)                         | TCF20    | 0.0313 | 1.14 |
| Transcription factor 20 (AR1)                         | TCF20    | 0.0313 | 1.14 |
| 3-hydroxyacyl-coa dehydratase 1                       | HACD1    | 0.0300 | 1.14 |
| Leucine rich repeat containing 23                     | LRRC23   | 0.0127 | 1.14 |
| Complement component 3                                | C3       | 0.0402 | 1.14 |
| Calcium channel, voltage-dependent, alpha 2           | CACNA2D2 | 0.0307 | 1.14 |
| Chondroitin polymerizing factor 2                     | CHPF2    | 0.0072 | 1.14 |
| Terminal uridylyl transferase 1, U6 snrna-specific    | TUT1     | 0.0309 | 1.14 |
| Acyl-coa synthetase medium-chain family member 2B     | ACSM2B   | 0.0329 | 1.14 |
| Surfeit 6                                             | SURF6    | 0.0360 | 1.14 |
| Chymotrypsin-like elastase family, member 3B          | CELA3B   | 0.0415 | 1.14 |
| Diacylglycerol kinase, delta 130kda                   | DGKD     | 0.0362 | 1.14 |

|                                                                                      |              |        |      |
|--------------------------------------------------------------------------------------|--------------|--------|------|
| Mitochondrial ribosomal protein S16                                                  | MRPS16       | 0.0230 | 1.14 |
| Sp6 transcription factor                                                             | SP6          | 0.0120 | 1.14 |
| Ring finger protein 186                                                              | RNF186       | 0.0257 | 1.14 |
| Uncharacterized LOC102724957                                                         | LOC102724957 | 0.0445 | 1.14 |
| Claudin 34                                                                           | CLDN34       | 0.0146 | 1.14 |
| Transmembrane protein 173                                                            | TMEM173      | 0.0305 | 1.14 |
| Chromosome 11 open reading frame 68                                                  | C11orf68     | 0.0289 | 1.14 |
| Polymerase (DNA directed), mu                                                        | POLM         | 0.0318 | 1.14 |
| Platelet-activating factor acetylhydrolase 1b, catalytic subunit                     | PAFAH1B3     | 0.0289 | 1.14 |
| Zinc finger protein 460                                                              | ZNF460       | 0.0180 | 1.14 |
| Ubiquitin specific peptidase 17-like family member 2                                 | USP17L2      | 0.0299 | 1.14 |
| Tripartite motif family like 1                                                       | TRIML1       | 0.0163 | 1.14 |
| Ribosomal protein S25                                                                | RPS25        | 0.0190 | 1.14 |
| Angel homolog 2 (Drosophila)                                                         | ANGEL2       | 0.0467 | 1.14 |
| Solute carrier family 35 (UDP-glucose) member 1                                      | SLC35D1      | 0.0443 | 1.14 |
| Chromosome 8 open reading frame 76                                                   | C8orf76      | 0.0343 | 1.14 |
| BAI1-associated protein 2                                                            | BAIAP2       | 0.0117 | 1.14 |
| N-terminal EF-hand calcium binding protein 3                                         | NECAB3       | 0.0059 | 1.14 |
| Proteasome inhibitor subunit 1                                                       | PSMF1        | 0.0298 | 1.14 |
| Nudix hydrolase 4                                                                    | NUDT4        | 0.0313 | 1.14 |
| DND microRNA-mediated repression inhibitor 1                                         | DND1         | 0.0274 | 1.14 |
| Sarcolipin                                                                           | SLN          | 0.0401 | 1.14 |
| Leukocyte immunoglobulin-like receptor, subfamily B (with DDRGK domain) containing 1 | LILRB1       | 0.0499 | 1.14 |
| Chromosome 1 open reading frame 87                                                   | C1orf87      | 0.0382 | 1.14 |
| ADAM metallopeptidase with thrombospondin type 1 motif 4                             | ADAMTS4      | 0.0482 | 1.14 |
| Forkhead box E3                                                                      | FOXE3        | 0.0172 | 1.14 |
| PRAME family member 10                                                               | PRAMEF10     | 0.0427 | 1.14 |
| Spermidine                                                                           | SATL1        | 0.0407 | 1.13 |
| Small muscle protein, X-linked                                                       | SMPX         | 0.0418 | 1.13 |
| Heterogeneous nuclear ribonucleoprotein A                                            | HNRNPAB      | 0.0485 | 1.13 |
| 1-acylglycerol-3-phosphate O-acyltransferase 3                                       | AGPAT3       | 0.0441 | 1.13 |
| Phosphatase like 3                                                                   | PDCL3        | 0.0296 | 1.13 |
| RNA binding motif (RNP1, RRM) protein 3                                              | RBM3         | 0.0326 | 1.13 |

|                                                               |              |        |      |
|---------------------------------------------------------------|--------------|--------|------|
| Carboxypeptidase N, polypeptide 1                             | CPN1         | 0.0418 | 1.13 |
| Guanylate binding protein 7                                   | GBP7         | 0.0444 | 1.13 |
| Free fatty acid receptor 2                                    | FFAR2        | 0.0168 | 1.13 |
| Pseudouridylate synthase 1                                    | PUS1         | 0.0498 | 1.13 |
| Apelin receptor                                               | APLNR        | 0.0310 | 1.13 |
| Transmembrane protein 14B                                     | TMEM14B      | 0.0391 | 1.13 |
| TSPY-like 5                                                   | TSPYL5       | 0.0305 | 1.13 |
| Uncharacterized LOC728485                                     | LOC728485    | 0.0367 | 1.13 |
| Synuclein gamma                                               | SNCG         | 0.0477 | 1.13 |
| 3-oxoacid coa-transferase 2<br>pseudogene 1                   | OXCT2P1      | 0.0315 | 1.13 |
| Neuronatin                                                    | NNAT         | 0.0447 | 1.13 |
| Chromosome X open reading frame<br>38                         | CXorf38      | 0.0462 | 1.13 |
| MT-RNR2-like 7                                                | MTRNR2L7     | 0.0362 | 1.13 |
| Plexin B2                                                     | PLXNB2       | 0.0465 | 1.13 |
| Vomer nasal 1 receptor 1                                      | VN1R1        | 0.0141 | 1.13 |
| C-type lectin domain family 1,<br>member B                    | CLEC1B       | 0.0264 | 1.13 |
| Cyclin Pas1                                                   | CNPPD1       | 0.0431 | 1.13 |
| Atonal bhlh transcription factor 1                            | ATOH1        | 0.0347 | 1.13 |
| DEXH (Asp-Glu-X-His) box<br>polypeptide 58                    | DHX58        | 0.0224 | 1.13 |
| Solute carrier family 19 (folate<br>transporter), member 1    | SLC19A1      | 0.0151 | 1.13 |
| MAGE family member A12                                        | MAGEA12      | 0.0411 | 1.13 |
| Forkhead box L1-like                                          | WI2-237311.2 | 0.0363 | 1.13 |
| Visinin like 1                                                | VSNL1        | 0.0446 | 1.13 |
| Olfactory receptor, family 2,<br>subfamily J, member 1 (gen   | OR2J1        | 0.0226 | 1.13 |
| Thrombospondin type 1 domain<br>containing 7B                 | THSD7B       | 0.0493 | 1.13 |
| Reversion-inducing-cysteine-rich<br>protein with kazal motifs | RECK         | 0.0219 | 1.13 |
| Adaptor-related protein complex 3,<br>mu 2 subunit            | AP3M2        | 0.0338 | 1.13 |
| Family with sequence similarity 200,<br>member B              | FAM200B      | 0.0421 | 1.13 |
| Pleckstrin homology-like domain,<br>family A, member 3        | PHLDA3       | 0.0196 | 1.13 |
| Anaphase promoting complex<br>subunit 11                      | ANAPC11      | 0.0181 | 1.13 |
| Transmembrane and coiled-coil<br>domains 1                    | TMCO1        | 0.0270 | 1.13 |
| Ribosomal protein S6 kinase, 70kda,<br>polypeptide 2          | RPS6KB2      | 0.0355 | 1.13 |
| Perilipin 3                                                   | PLIN3        | 0.0268 | 1.12 |



|                                                                   |          |        |      |
|-------------------------------------------------------------------|----------|--------|------|
| PRKC, apoptosis, WT1, regulator                                   | PAWR     | 0.0246 | 1.12 |
| Zinc finger protein 227                                           | ZNF227   | 0.0476 | 1.12 |
| Tyrosine 3-monooxygenase                                          | YWHAQ    | 0.0166 | 1.12 |
| FERM domain containing 6                                          | FRMD6    | 0.0343 | 1.12 |
| Gremlin 1, DAN family BMP antagonist                              | GREM1    | 0.0454 | 1.12 |
| O-sialoglycoprotein endopeptidase                                 | OSGEP    | 0.0492 | 1.12 |
| Olfactory receptor, family 52, subfamily I, member 1              | OR5211   | 0.0379 | 1.12 |
| Ubiquinol-cytochrome c reductase hinge protein                    | UQCRH    | 0.0416 | 1.12 |
| TBC1 domain family, member 28                                     | TBC1D28  | 0.0436 | 1.12 |
| Neural retina leucine zipper                                      | NRL      | 0.0400 | 1.12 |
| Lectin, mannose-binding 2-like                                    | LMAN2L   | 0.0447 | 1.12 |
| Phospholipid scramblase 2                                         | PLSCR2   | 0.0240 | 1.12 |
| Zhang2013 ALT_ACCEPTOR, ALT_DONOR, coding, INTERNAL, intron       | SNX5     | 0.0455 | 1.12 |
| Synthetic construct Homo sapiens clone IMAGE:100069019, MGC:19903 | MBD3L2   | 0.0431 | 1.12 |
| Myotubularin related protein 8                                    | MTMR8    | 0.0344 | 1.12 |
| Centrosomal protein 97kda                                         | CEP97    | 0.0434 | 1.12 |
| Bobby sox homolog (Drosophila)                                    | BBX      | 0.0492 | 1.12 |
| Arachidonate 15-lipoxygenase                                      | ALOX15   | 0.0326 | 1.12 |
| Zinc finger protein 391                                           | ZNF391   | 0.0360 | 1.12 |
| Aprataxin and PNKP like factor                                    | APLF     | 0.0250 | 1.12 |
| Kyphoscoliosis peptidase                                          | KY       | 0.0450 | 1.12 |
| PCF11 cleavage and polyadenylation factor subunit                 | PCF11    | 0.0369 | 1.12 |
| UDP glucuronosyltransferase 2 family, polypeptide B7              | UGT2B7   | 0.0372 | 1.12 |
| G protein pathway suppressor 1                                    | GPS1     | 0.0282 | 1.12 |
| Ret finger protein-like 3                                         | RFPL3    | 0.0305 | 1.12 |
| CDC42 effector protein (Rho gtpase binding) 1                     | CDC42EP1 | 0.0389 | 1.12 |
| Tripartite motif family like 2                                    | TRIML2   | 0.0255 | 1.12 |
| Apolipoprotein C-II                                               | APOC2    | 0.0329 | 1.12 |
| UBX domain protein 1                                              | UBXN1    | 0.0167 | 1.12 |
| FIC domain containing                                             | FICD     | 0.0243 | 1.12 |
| GATA zinc finger domain containing 1                              | GATAD1   | 0.0154 | 1.12 |
| Family with sequence similarity 179, member B                     | FAM179B  | 0.0397 | 1.12 |
| Emopamil binding protein (sterol isomerase)                       | EBP      | 0.0490 | 1.11 |
| Ring finger protein 148                                           | RNF148   | 0.0370 | 1.11 |

|                                                                         |              |        |       |
|-------------------------------------------------------------------------|--------------|--------|-------|
| U2 small nuclear RNA auxiliary factor 1                                 | U2AF1        | 0.0404 | 1.11  |
| Neuronal tyrosine-phosphorylated phosphoinositide-3-kinase adapto       | NYAP1        | 0.0180 | 1.11  |
| Testis specific 10                                                      | TSGA10       | 0.0241 | 1.11  |
| Ubiquitin domain containing 1                                           | UBTD1        | 0.0366 | 1.11  |
| Ubiquitin conjugating enzyme E2A DEAD (Asp-Glu-Ala-Asp) box             | UBE2A        | 0.0228 | 1.11  |
| helicase 42                                                             | DDX42        | 0.0472 | 1.11  |
| Abl-interactor 2                                                        | ABI2         | 0.0052 | 1.11  |
| Keratin 1, type II                                                      | KRT1         | 0.0430 | 1.11  |
| Glutamate rich 6B                                                       | ERICH6B      | 0.0292 | 1.11  |
| Slit guidance ligand 2                                                  | SLIT2        | 0.0271 | 1.11  |
| Ets variant 4                                                           | ETV4         | 0.0392 | 1.11  |
| Gamma-glutamyl carboxylase                                              | GGCX         | 0.0333 | 1.11  |
| Tripartite motif containing 17                                          | TRIM17       | 0.0373 | 1.11  |
| Dual specificity tyrosine-(Y)-phosphorylation regulated kinase KIAA1109 | DYRK3        | 0.0420 | 1.10  |
| Coatomer protein complex subunit beta 1                                 | KIAA1109     | 0.0493 | 1.10  |
| TATA box binding protein like 2                                         | COPB1        | 0.0175 | 1.10  |
| WW domain containing E3 ubiquitin protein ligase 1                      | TBPL2        | 0.0412 | 1.10  |
| Achaete-scute family bhlh transcription factor 4                        | WWP1         | 0.0099 | 1.10  |
| VMA21 vacuolar H <sup>+</sup> -atpase homolog (S. Cerevisiae)           | ASCL4        | 0.0195 | 1.10  |
| Primase, DNA, polypeptide 2 (58kda)                                     | VMA21        | 0.0208 | 1.10  |
| Family with sequence similarity 234, member B                           | PRIM2        | 0.0404 | 1.10  |
| Epoxide hydrolase 2, cytoplasmic                                        | FAM234B      | 0.0212 | 1.10  |
| NPHP3-ACAD11 readthrough (NMD candidate)                                | EPHX2        | 0.0353 | 1.10  |
| Katanin p60 subunit A-like 1                                            | NPHP3-ACAD11 | 0.0382 | 1.10  |
| MAGE family member A9B                                                  | KATNAL1      | 0.0451 | 1.10  |
| Oligodendrocyte myelin glycoprotein                                     | MAGEA9B      | 0.0499 | 1.10  |
| Cell division cycle 42                                                  | OMG          | 0.0338 | 1.10  |
| Olfactory receptor, family 10, subfamily V, member 1                    | CDC42        | 0.0315 | 1.09  |
| Keratin associated protein 13-4                                         | OR10V1       | 0.0260 | 1.09  |
| HSPE1-MOB4 readthrough                                                  | KRTAP13-4    | 0.0245 | 1.09  |
| CD58 molecule                                                           | HSPE1-MOB4   | 0.0374 | 1.08  |
| Family with sequence similarity 63, member B                            | CD58         | 0.0478 | -1.07 |
|                                                                         | FAM63B       | 0.0447 | -1.07 |

|                                                      |           |        |       |
|------------------------------------------------------|-----------|--------|-------|
| Olfactory receptor, family 56, subfamily A, member 3 | OR56A3    | 0.0237 | -1.07 |
| HORMA domain containing 2                            | HORMAD2   | 0.0355 | -1.07 |
| Hornerin                                             | HRNR      | 0.0448 | -1.07 |
| Alkaline ceramidase 3                                | ACER3     | 0.0417 | -1.07 |
| Rho gtpase activating protein 11B                    | ARHGAP11B | 0.0432 | -1.08 |
| NSFL1 (p97) cofactor (p47)                           | NSFL1C    | 0.0277 | -1.08 |
| General transcription factor IIIA                    | GTF3A     | 0.0378 | -1.08 |
| Family with sequence similarity 177, member A1       | FAM177A1  | 0.0457 | -1.08 |
| MCF.2 cell line derived transforming sequence-like 2 | MCF2L2    | 0.0490 | -1.08 |
| Extended synaptotagmin-like protein 2                | ESYT2     | 0.0415 | -1.08 |
| Kelch-like family member 9                           | KLHL9     | 0.0477 | -1.08 |
| Coiled-coil domain containing 88C                    | CCDC88C   | 0.0417 | -1.09 |
| Amphiregulin                                         | AREG      | 0.0349 | -1.09 |
| NLR family, apoptosis inhibitory protein             | NAIP      | 0.0288 | -1.09 |
| KIAA0101                                             | KIAA0101  | 0.0390 | -1.09 |
| Cleavage and polyadenylation specific factor 4-like  | CPSF4L    | 0.0458 | -1.09 |
| Olfactory receptor, family 51, subfamily F, member 2 | OR51F2    | 0.0347 | -1.09 |
| EF-hand calcium binding domain 13                    | EFCAB13   | 0.0343 | -1.09 |
| Protein tyrosine phosphatase, non-receptor type 11   | PTPN11    | 0.0424 | -1.09 |
| Transmembrane protein 50A                            | TMEM50A   | 0.0389 | -1.09 |
| Zinc finger protein 546                              | ZNF546    | 0.0327 | -1.09 |
| ALG11, alpha-1,2-mannosyltransferase                 | ALG11     | 0.0269 | -1.09 |
| Ribosomal protein L9 pseudogene 7                    | RPL9P7    | 0.0296 | -1.09 |
| Chromosome 5 open reading frame 30                   | C5orf30   | 0.0325 | -1.09 |
| Olfactory receptor, family 11, subfamily H, member 6 | OR11H6    | 0.0387 | -1.09 |
| Tudor domain containing 5                            | TDRD5     | 0.0296 | -1.09 |
| Tubulin, delta 1                                     | TUBD1     | 0.0147 | -1.09 |
| Transcription factor A, mitochondrial                | TFAM      | 0.0362 | -1.09 |
| Integrator complex subunit 8                         | INTS8     | 0.0499 | -1.09 |
| Zinc finger and BTB domain containing 32             | ZBTB32    | 0.0493 | -1.09 |
| T cell receptor associated transmembrane adaptor 1   | TRAT1     | 0.0316 | -1.09 |
| Transcript Identified by aceview, Entrez Gene        | RAD51AP2  | 0.0455 | -1.09 |

|                                                                   |           |        |       |
|-------------------------------------------------------------------|-----------|--------|-------|
| Aquaporin 11                                                      | AQP11     | 0.0077 | -1.09 |
| Ras homolog enriched in brain                                     | RHEB      | 0.0143 | -1.10 |
| Transmembrane protein 30A                                         | TMEM30A   | 0.0376 | -1.10 |
| Signal transducer and activator of transcription 4                | STAT4     | 0.0265 | -1.10 |
| Zinc activated ligand-gated ion channel                           | ZACN      | 0.0397 | -1.10 |
| Ubiquitin-fold modifier 1                                         | UFM1      | 0.0442 | -1.10 |
| Thyroid hormone receptor interactor 11                            | TRIP11    | 0.0490 | -1.10 |
| POTE ankyrin domain family, member D                              | POTED     | 0.0156 | -1.10 |
| Utrophin                                                          | UTRN      | 0.0381 | -1.10 |
| Centrosomal protein 83kda                                         | CEP83     | 0.0070 | -1.10 |
| Proteasome 26S subunit, non-atpase 1                              | PSMD1     | 0.0312 | -1.10 |
| Glucosaminyl (N-acetyl) transferase 2, I-branching enzyme (I bloo | GCNT2     | 0.0483 | -1.10 |
| Nucleotide-binding oligomerization domain containing 2            | NOD2      | 0.0495 | -1.10 |
| Defensin, beta 121                                                | DEFB121   | 0.0416 | -1.10 |
| Naked cuticle homolog 1 (Drosophila)                              | NKD1      | 0.0487 | -1.10 |
| Tubby like protein 4                                              | TULP4     | 0.0469 | -1.10 |
| Membrane associated ring finger 8                                 | MARCH8    | 0.0116 | -1.10 |
| F-box protein 6                                                   | FBXO6     | 0.0246 | -1.10 |
| Macrophage scavenger receptor 1                                   | MSR1      | 0.0448 | -1.10 |
| Chromosome 10 open reading frame 107                              | C10orf107 | 0.0124 | -1.10 |
| Ermin                                                             | ERMN      | 0.0316 | -1.10 |
| WD repeat domain 66                                               | WDR66     | 0.0485 | -1.10 |
| G protein-coupled receptor 89A                                    | GPR89A    | 0.0362 | -1.10 |
| Deleted in azoospermia 4                                          | DAZ4      | 0.0432 | -1.10 |
| LMBR1 domain containing 2                                         | LMBRD2    | 0.0267 | -1.10 |
| Coiled-coil domain containing 89                                  | CCDC89    | 0.0484 | -1.10 |
| Coiled-coil domain containing 84                                  | CCDC84    | 0.0485 | -1.10 |
| NMD3 ribosome export adaptor                                      | NMD3      | 0.0150 | -1.10 |
| HLA complex group 22                                              | HCG22     | 0.0151 | -1.11 |
| Ankyrin repeat domain 62                                          | ANKRD62   | 0.0455 | -1.11 |
| Centrosomal protein 290kda                                        | CEP290    | 0.0284 | -1.11 |
| Kinesin family member 3A                                          | KIF3A     | 0.0355 | -1.11 |
| Urotensin 2                                                       | UTS2      | 0.0343 | -1.11 |
| Astrotactin 2                                                     | ASTN2     | 0.0171 | -1.11 |
| Eukaryotic translation initiation factor 1B                       | EIF1B     | 0.0485 | -1.11 |
| Myosin, heavy chain 10, non-muscle                                | MYH10     | 0.0284 | -1.11 |
| Numb homolog (Drosophila)-like                                    | NUMBL     | 0.0498 | -1.11 |

|                                                                                                      |          |        |       |
|------------------------------------------------------------------------------------------------------|----------|--------|-------|
| Mediator complex subunit 21                                                                          | MED21    | 0.0314 | -1.11 |
| Nuclear factor of kappa light polypeptide gene enhancer in B-SMC5-SMC6 complex localization factor 1 | NFKBIZ   | 0.0447 | -1.11 |
| EF-hand calcium binding domain 5                                                                     | SLF1     | 0.0448 | -1.11 |
| Transmembrane phosphatase with tensin homology                                                       | EFCAB5   | 0.0154 | -1.11 |
| Zhang2013 ALT_DONOR, coding, INTERNAL, intronic, OVERLAPTX                                           | TPTE     | 0.0122 | -1.11 |
| Topoisomerase (DNA) II binding protein 1                                                             | LARP7    | 0.0459 | -1.11 |
| Zinc finger protein 502                                                                              | TOPBP1   | 0.0488 | -1.11 |
| Autophagy                                                                                            | ZNF502   | 0.0425 | -1.11 |
| LSM3 homolog, U6 small nuclear RNA and mrna degradation associated                                   | AMBRA1   | 0.0345 | -1.11 |
| Kinetochore associated 1                                                                             | LSM3     | 0.0472 | -1.11 |
| Methionyl aminopeptidase 1                                                                           | KNTC1    | 0.0240 | -1.11 |
| Solute carrier family 38, member 4                                                                   | METAP1   | 0.0049 | -1.11 |
| Salt-inducible kinase 1                                                                              | SLC38A4  | 0.0175 | -1.11 |
| Integrin beta 3 binding protein (beta3-endonexin)                                                    | SIK1     | 0.0195 | -1.11 |
| Prostaglandin E synthase 3 (cytosolic)                                                               | ITGB3BP  | 0.0205 | -1.11 |
| NADH dehydrogenase (ubiquinone) complex I, assembly factor 6                                         | PTGES3   | 0.0405 | -1.11 |
| Pleckstrin homology domain containing, family G (with rhogef                                         | NDUFAF6  | 0.0151 | -1.11 |
| Star-related lipid transfer domain containing 4                                                      | PLEKHG7  | 0.0432 | -1.11 |
| Chromobox homolog 7                                                                                  | STARD4   | 0.0442 | -1.11 |
| Nucleolar protein 8                                                                                  | CBX7     | 0.0326 | -1.11 |
| Ring finger protein 133                                                                              | NOL8     | 0.0144 | -1.11 |
| Growth hormone receptor                                                                              | RNF133   | 0.0269 | -1.11 |
| Ankyrin repeat domain 18B                                                                            | GHR      | 0.0323 | -1.11 |
| Acyl-coa thioesterase 12                                                                             | ANKRD18B | 0.0058 | -1.11 |
| Glycophorin B (MNS blood group)                                                                      | ACOT12   | 0.0192 | -1.11 |
| EF-hand calcium binding domain 2                                                                     | GYPB     | 0.0102 | -1.11 |
| Interferon-induced protein 44                                                                        | EFCAB2   | 0.0402 | -1.11 |
| CWF19-like 2, cell cycle control (S. Pombe)                                                          | IFI44    | 0.0227 | -1.11 |
| NUF2, NDC80 kinetochore complex component                                                            | CWF19L2  | 0.0258 | -1.11 |
| Ecotropic viral integration site 5                                                                   | NUF2     | 0.0462 | -1.11 |
| HECT domain and ankyrin repeat containing E3 ubiquitin protein li                                    | EVI5     | 0.0373 | -1.11 |
|                                                                                                      | HACE1    | 0.0422 | -1.11 |

|                                                                   |              |        |       |
|-------------------------------------------------------------------|--------------|--------|-------|
| Taste receptor, type 2, member 38                                 | TAS2R38      | 0.0271 | -1.11 |
| Zinc finger protein 365                                           | ZNF365       | 0.0459 | -1.11 |
| Coiled-coil domain containing 50                                  | CCDC50       | 0.0458 | -1.11 |
| Protein tyrosine phosphatase, non-receptor type 2                 | PTPN2        | 0.0171 | -1.11 |
| Cyclin-dependent kinase 19                                        | CDK19        | 0.0184 | -1.11 |
| HECT domain containing E3 ubiquitin protein ligase 2              | HECTD2       | 0.0134 | -1.11 |
| SPATA31 subfamily D, member 4                                     | SPATA31D4    | 0.0480 | -1.11 |
| Trichoplein, keratin filament binding                             | TCHP         | 0.0364 | -1.11 |
| Wolfram syndrome 1 (wolframin)                                    | WFS1         | 0.0496 | -1.11 |
| Enoyl-coa, hydratase                                              | EHHADH       | 0.0490 | -1.11 |
| Chromosome 6 open reading frame 222                               | C6orf222     | 0.0416 | -1.11 |
| Nicotinamide riboside kinase 1                                    | NMRK1        | 0.0037 | -1.11 |
| Ubiquitin specific peptidase 17-like family member 28             | USP17L28     | 0.0154 | -1.11 |
| Lysosomal-associated membrane protein 2                           | LAMP2        | 0.0215 | -1.11 |
| ADAM metallopeptidase domain 21                                   | ADAM21       | 0.0440 | -1.11 |
| Memczak2013 ANTISENSE, coding, INTERNAL, intronic best tr         | ADAM28       | 0.0387 | -1.11 |
| Olfactory receptor, family 5, subfamily P, member 2               | OR5P2        | 0.0082 | -1.11 |
| Uncharacterized LOC100130691                                      | LOC100130691 | 0.0394 | -1.11 |
| Activating transcription factor 7 interacting protein 2           | ATF7IP2      | 0.0314 | -1.11 |
| Carbonic anhydrase VIII                                           | CA8          | 0.0148 | -1.11 |
| MIS12 kinetochore complex component                               | MIS12        | 0.0476 | -1.11 |
| SNF2 histone linker PHD RING helicase, E3 ubiquitin protein li    | SHPRH        | 0.0314 | -1.11 |
| G protein-coupled receptor 65                                     | GPR65        | 0.0317 | -1.11 |
| Syntrophin, beta 1 (dystrophin-associated protein A1, 59kda, basi | SNTB1        | 0.0479 | -1.11 |
| Chromosome 15 open reading frame 40                               | C15orf40     | 0.0467 | -1.11 |
| Relaxin                                                           | RXFP2        | 0.0051 | -1.12 |
| Zinc finger protein 383                                           | ZNF383       | 0.0280 | -1.12 |
| Chromosome 12 open reading frame 66                               | C12orf66     | 0.0196 | -1.12 |
| NOP2                                                              | NSUN6        | 0.0457 | -1.12 |
| Transducin (beta)-like 1 X-linked receptor 1                      | TBL1XR1      | 0.0121 | -1.12 |
| N-deacetylase                                                     | NDST3        | 0.0363 | -1.12 |
| N(alpha)-acetyltransferase 35, natc auxiliary subunit             | NAA35        | 0.0011 | -1.12 |

|                                                            |               |        |       |
|------------------------------------------------------------|---------------|--------|-------|
| Neuron navigator 3                                         | NAV3          | 0.0298 | -1.12 |
| Olfactory receptor, family 8, subfamily B, member 3        | OR8B3         | 0.0088 | -1.12 |
| Uncharacterized LOC151121                                  | LOC151121     | 0.0242 | -1.12 |
| Jeck2013 ALT_ACCEPTOR, ALT_DONOR, coding, INTERNAL, intron | AGAP1         | 0.0345 | -1.12 |
| Guanylate binding protein 2, interferon-inducible          | GBP2          | 0.0336 | -1.12 |
| Heat shock transcription factor 2                          | HSF2          | 0.0233 | -1.12 |
| Solute carrier family 16 (monocarboxylate transporter), m  | SLC16A1       | 0.0099 | -1.12 |
| T brachyury transcription factor                           | T             | 0.0226 | -1.12 |
| RAD18 E3 ubiquitin protein ligase                          | RAD18         | 0.0425 | -1.12 |
| ADAM metallopeptidase domain 28                            | ADAM28        | 0.0178 | -1.12 |
| Zinc finger, HIT-type containing 6                         | ZNHIT6        | 0.0095 | -1.12 |
| TBC1 domain family, member 23                              | TBC1D23       | 0.0316 | -1.12 |
| Arginyltransferase 1                                       | ATE1          | 0.0313 | -1.12 |
| Endothelial differentiation-related factor 1               | EDF1          | 0.0474 | -1.12 |
| Secernin 1                                                 | SCRN1         | 0.0218 | -1.12 |
| Retinoblastoma binding protein 5                           | RBBP5         | 0.0346 | -1.12 |
| Transmembrane protein 255A                                 | TMEM255A      | 0.0357 | -1.12 |
| CTAGE family, member 5                                     | CTAGE5        | 0.0297 | -1.12 |
| CCDC144NL antisense RNA 1                                  | CCDC144NL-AS1 | 0.0250 | -1.12 |
| Diacylglycerol kinase, epsilon 64kda                       | DGKE          | 0.0273 | -1.12 |
| Zinc finger protein 223                                    | ZNF223        | 0.0421 | -1.12 |
| Mucolipin 2                                                | MCOLN2        | 0.0296 | -1.12 |
| Ligase IV, DNA, ATP-dependent                              | LIG4          | 0.0371 | -1.12 |
| Zinc finger protein 224                                    | ZNF224        | 0.0380 | -1.12 |
| Arfgap with gtpase domain, ankyrin repeat and PH domain 9  | AGAP9         | 0.0302 | -1.12 |
| Chromosome 5 open reading frame 58                         | C5orf58       | 0.0313 | -1.12 |
| Zinc finger protein 181                                    | ZNF181        | 0.0214 | -1.12 |
| SET domain, bifurcated 2                                   | SETDB2        | 0.0154 | -1.12 |
| Regulator of cell cycle                                    | RGCC          | 0.0186 | -1.12 |
| Cysteine rich with EGF-like domains 2                      | CRELD2        | 0.0203 | -1.12 |
| Neurobeachin like 1                                        | NBEAL1        | 0.0112 | -1.12 |
| Vacuolar protein sorting 51 homolog (S. Cerevisiae)        | VPS51         | 0.0346 | -1.12 |
| Alpha thalassemia                                          | ATRX          | 0.0088 | -1.12 |
| Ubiquitin-like domain containing CTD phosphatase 1         | UBLCP1        | 0.0362 | -1.12 |
| Leucine rich repeat containing 40                          | LRRC40        | 0.0464 | -1.12 |
| Claudin 2                                                  | CLDN2         | 0.0393 | -1.12 |

|                                                                  |             |        |       |
|------------------------------------------------------------------|-------------|--------|-------|
| Golgin A8 family, member A                                       | GOLGA8A     | 0.0441 | -1.12 |
| DCN1, defective in cullin neddylation 1, domain containing 3     | DCUN1D3     | 0.0410 | -1.12 |
| Zinc finger protein 780A                                         | ZNF780A     | 0.0193 | -1.12 |
| RAN binding protein 6                                            | RANBP6      | 0.0310 | -1.12 |
| Brain expressed X-linked 2                                       | BEX2        | 0.0410 | -1.12 |
| Transmembrane protein 208                                        | TMEM208     | 0.0449 | -1.12 |
| CD99 molecule-like 2                                             | CD99L2      | 0.0308 | -1.12 |
| Protein phosphatase 2, regulatory subunit B, alpha               | PPP2R2A     | 0.0449 | -1.12 |
| Family with sequence similarity 160, member B2                   | FAM160B2    | 0.0394 | -1.12 |
| Cytochrome c oxidase subunit VIII C                              | COX8C       | 0.0427 | -1.12 |
| Thiosulfate sulfurtransferase (rhodanese)-like domain containing | TSTD3       | 0.0259 | -1.12 |
| SLAM family member 7                                             | SLAMF7      | 0.0233 | -1.12 |
| Transcript Identified by aceview                                 | boyboy      | 0.0287 | -1.12 |
| Zinc finger protein 136                                          | ZNF136      | 0.0174 | -1.12 |
| TBC1 domain family, member 31                                    | TBC1D31     | 0.0219 | -1.13 |
| Breast cancer metastasis-suppressor 1-like                       | BRMS1L      | 0.0260 | -1.13 |
| MAS-related GPR, member X4                                       | MRGPRX4     | 0.0453 | -1.13 |
| LLP homolog, long-term synaptic facilitation (Aplysia)           | LLPH        | 0.0299 | -1.13 |
| INO80B-WBP1 readthrough (NMD candidate)                          | INO80B-WBP1 | 0.0155 | -1.13 |
| Castor zinc finger 1                                             | CASZ1       | 0.0444 | -1.13 |
| BCL2-like 14 (apoptosis facilitator)                             | BCL2L14     | 0.0473 | -1.13 |
| Retinoblastoma binding protein 7                                 | RBBP7       | 0.0467 | -1.13 |
| Transcription elongation factor A (SII)-like 6                   | TCEAL6      | 0.0380 | -1.13 |
| Coiled-coil domain containing 102B                               | CCDC102B    | 0.0056 | -1.13 |
| Zinc finger protein 532                                          | ZNF532      | 0.0378 | -1.13 |
| Transcript Identified by aceview, Entrez Gene ID(s) 52           | PHKB        | 0.0279 | -1.13 |
| Trafficking protein particle complex 4                           | TRAPPC4     | 0.0278 | -1.13 |
| DIS3 like 3-5 exoribonuclease 2                                  | DIS3L2      | 0.0029 | -1.13 |
| GIPC PDZ domain containing family, member 1                      | GIPC1       | 0.0479 | -1.13 |
| Bosome interacting protein 1                                     | BBIP1       | 0.0371 | -1.13 |
| ST20-MTHFS readthrough                                           | ST20-MTHFS  | 0.0253 | -1.13 |
| TBC1 domain family, member 8 (with GRAM domain)                  | TBC1D8      | 0.0326 | -1.13 |
| Olfactory receptor, family 4, subfamily C, member 45             | OR4C45      | 0.0159 | -1.13 |
| Dual specificity phosphatase 19                                  | DUSP19      | 0.0150 | -1.13 |



|                                                               |           |        |       |
|---------------------------------------------------------------|-----------|--------|-------|
| Zinc finger protein 483                                       | ZNF483    | 0.0181 | -1.13 |
| Polymerase (DNA directed), theta                              | POLQ      | 0.0469 | -1.13 |
| Family with sequence similarity 46, member A                  | FAM46A    | 0.0107 | -1.13 |
| Olfactory receptor, family 2, subfamily M, member 7           | OR2M7     | 0.0303 | -1.13 |
| Complement component 1, q subcomponent-like 3                 | C1QL3     | 0.0202 | -1.13 |
| Aprataxin                                                     | APTX      | 0.0141 | -1.13 |
| Nuclear RNA export factor 2B                                  | NXF2B     | 0.0074 | -1.13 |
| Serine peptidase inhibitor, Kazal type 8 (putative)           | SPINK8    | 0.0017 | -1.13 |
| Transcription elongation factor A (SII)-like 3                | TCEAL3    | 0.0454 | -1.13 |
| Keratin 24, type I                                            | KRT24     | 0.0385 | -1.13 |
| Cystic fibrosis transmembrane conductance regulator           | CFTR      | 0.0047 | -1.13 |
| ELL associated factor 2                                       | EAF2      | 0.0356 | -1.13 |
| Cilia and flagella associated protein 61                      | CFAP61    | 0.0178 | -1.13 |
| La ribonucleoprotein domain family, member 1                  | LARP1     | 0.0467 | -1.13 |
| Long intergenic non-protein coding RNA 174                    | LINC00174 | 0.0081 | -1.13 |
| Mannose receptor, C type 2                                    | MRC2      | 0.0193 | -1.13 |
| Transmembrane protein 78                                      | TMEM78    | 0.0220 | -1.13 |
| Protease, serine 35                                           | PRSS35    | 0.0370 | -1.13 |
| Zinc finger protein 239                                       | ZNF239    | 0.0142 | -1.13 |
| Eukaryotic translation initiation factor 2-alpha kinase 2     | EIF2AK2   | 0.0146 | -1.13 |
| Transcript Identified by aceview, Entrez Gene ID(s) 8453      | CUL2      | 0.0314 | -1.13 |
| Family with sequence similarity 186, member A                 | FAM186A   | 0.0301 | -1.13 |
| Transcript Identified by aceview, Entrez Gene ID(s) 78        | EVI5      | 0.0317 | -1.13 |
| Aminoacyl trna synthetase complex-interacting multifunctional | AIMP1     | 0.0286 | -1.13 |
| RANBP2-like and GRIP domain containing 2                      | RGPD2     | 0.0136 | -1.13 |
| Proprotein convertase subtilisin                              | PCSK5     | 0.0486 | -1.13 |
| Kv channel interacting protein 3, calsenilin                  | KCNIP3    | 0.0184 | -1.13 |
| Interleukin 7                                                 | IL7       | 0.0134 | -1.13 |
| Intraflagellar transport 46                                   | IFT46     | 0.0081 | -1.13 |
| Tryptophan hydroxylase 2                                      | TPH2      | 0.0253 | -1.13 |
| F-box protein 38                                              | FBXO38    | 0.0192 | -1.13 |

|                                                                 |         |        |       |
|-----------------------------------------------------------------|---------|--------|-------|
| Coiled-coil domain containing 66                                | CCDC66  | 0.0060 | -1.13 |
| Metastasis associated in colon cancer 1                         | MACC1   | 0.0407 | -1.13 |
| TP53 induced glycolysis regulatory phosphatase                  | TIGAR   | 0.0282 | -1.13 |
| Huntingtin interacting protein K                                | HYPK    | 0.0463 | -1.13 |
| Polycystic kidney and hepatic disease 1 (autosomal recessive)-l | PKHD1L1 | 0.0048 | -1.13 |
| Ring finger protein 25                                          | RNF25   | 0.0405 | -1.13 |
| TBCC domain containing 1                                        | TBCCD1  | 0.0380 | -1.13 |
| G2                                                              | G2E3    | 0.0032 | -1.13 |
| Myeloid                                                         | MLLT4   | 0.0435 | -1.13 |
| Melanoma inhibitory activity                                    | MIA     | 0.0342 | -1.13 |
| Xin actin binding repeat containing 2                           | XIRP2   | 0.0167 | -1.13 |
| Heat shock 10kda protein 1                                      | HSPE1   | 0.0438 | -1.13 |
| Olfactory receptor, family 1, subfamily L, member 8             | OR1L8   | 0.0442 | -1.13 |
| 3-hydroxyisobutyryl-coa hydrolase                               | HIBCH   | 0.0255 | -1.13 |
| THO complex 2                                                   | THOC2   | 0.0491 | -1.13 |
| Anaphase promoting complex subunit 13                           | ANAPC13 | 0.0285 | -1.13 |
| Integrin linked kinase                                          | ILK     | 0.0388 | -1.13 |
| Ras association (ralgds                                         | RASSF9  | 0.0229 | -1.13 |
| Integrator complex subunit 12                                   | INTS12  | 0.0196 | -1.13 |
| UDP-glucose glycoprotein glucosyltransferase 2                  | UGGT2   | 0.0239 | -1.13 |
| Spermatogenesis associated, serine-rich 2                       | SPATS2  | 0.0302 | -1.13 |
| FYVE, rhogef and PH domain containing 3                         | FGD3    | 0.0452 | -1.13 |
| Salt-inducible kinase 2                                         | SIK2    | 0.0219 | -1.13 |
| Guanine nucleotide binding protein (G protein), beta polypeptid | GNB3    | 0.0324 | -1.13 |
| Memczak2013 ALT_ACCEPTOR, ALT_DONOR, coding, INTERNAL, int      | XRCC5   | 0.0034 | -1.13 |
| Ras and Rab interactor like                                     | RINL    | 0.0251 | -1.13 |
| ADP-ribosylation factor like gtpase 9                           | ARL9    | 0.0378 | -1.14 |
| SUMO1                                                           | SENP7   | 0.0158 | -1.14 |
| Vacuolar protein sorting 45 homolog (S. Cerevisiae)             | VPS45   | 0.0295 | -1.14 |
| Zinc finger and BTB domain containing 7A                        | ZBTB7A  | 0.0488 | -1.14 |
| Transcript Identified by aceview, Entrez Gene ID(               | ARPP21  | 0.0497 | -1.14 |
| Myeloperoxidase                                                 | MPO     | 0.0446 | -1.14 |
| Disrupted in renal carcinoma 2                                  | DIRC2   | 0.0232 | -1.14 |

|                                                                              |           |        |       |
|------------------------------------------------------------------------------|-----------|--------|-------|
| Solute carrier family 35 (UDP-N-acetylglucosamine (UDP-glcna                 | SLC35A3   | 0.0348 | -1.14 |
| Family with sequence similarity 177, member A1                               | FAM177A1  | 0.0098 | -1.14 |
| Protein phosphatase 1, regulatory subunit 37                                 | PPP1R37   | 0.0388 | -1.14 |
| Multiple C2 domains, transmembrane 2                                         | MCTP2     | 0.0181 | -1.14 |
| Zinc finger, AN1-type domain 1                                               | ZFAND1    | 0.0469 | -1.14 |
| Coiled-coil domain containing 96                                             | CCDC96    | 0.0222 | -1.14 |
| Interferon, alpha 4                                                          | IFNA4     | 0.0294 | -1.14 |
| Transcript Identified by aceview, Entrez Gene ID(s) 79                       | SMC6      | 0.0260 | -1.14 |
| Trace amine associated receptor 8                                            | TAAR8     | 0.0487 | -1.14 |
| Dnaj (Hsp40) homolog, subfamily C, member 12                                 | DNAJC12   | 0.0366 | -1.14 |
| Long intergenic non-protein coding RNA 1496                                  | LINC01496 | 0.0297 | -1.14 |
| Chromodomain helicase DNA binding protein 9                                  | CHD9      | 0.0351 | -1.14 |
| Mediator complex subunit 7                                                   | MED7      | 0.0481 | -1.14 |
| Potassium channel, voltage gated eag related subfamily H, member TSPY-like 2 | KCNH7     | 0.0426 | -1.14 |
| MANSC domain containing 4                                                    | TSPYL2    | 0.0251 | -1.14 |
| Karyopherin alpha 3 (importin alpha 4)                                       | MANSC4    | 0.0242 | -1.14 |
| Ring finger protein 168, E3 ubiquitin protein ligase                         | KPNA3     | 0.0346 | -1.14 |
| Olfactory receptor, family 10, subfamily A, member 3                         | RNF168    | 0.0261 | -1.14 |
| Nuclear factor of kappa light polypeptide gene enhancer in B-c               | OR10A3    | 0.0130 | -1.14 |
| Protein prenyltransferase alpha subunit repeat containing 1                  | NFKB1     | 0.0354 | -1.14 |
| Ribosomal RNA adenine dimethylase domain containing 1                        | PTAR1     | 0.0246 | -1.14 |
| Cytochrome P450, family 3, subfamily A, polypeptide 7                        | RRNAD1    | 0.0178 | -1.14 |
| Zinc finger protein 275                                                      | CYP3A7    | 0.0147 | -1.14 |
| Spectrin, beta, non-erythrocytic 2                                           | ZNF275    | 0.0312 | -1.14 |
| Zhang2013 ALT_ACCEPTOR, ALT_DONOR, coding, INTERNAL, intro                   | SPTBN2    | 0.0377 | -1.14 |
| POC5 centriolar protein                                                      | EXOC7     | 0.0385 | -1.14 |
| Chromosome 20 open reading frame 197                                         | POC5      | 0.0050 | -1.14 |
|                                                                              | C20orf197 | 0.0427 | -1.14 |

|                                                            |          |        |       |
|------------------------------------------------------------|----------|--------|-------|
| GPN-loop gtpase 1                                          | GPN1     | 0.0371 | -1.14 |
| Interferon regulatory factor 6                             | IRF6     | 0.0233 | -1.14 |
| Trna methyltransferase 6                                   | TRMT6    | 0.0197 | -1.14 |
| SWT1 RNA endoribonuclease homolog                          | SWT1     | 0.0181 | -1.14 |
| Transmembrane protein 126A                                 | TMEM126A | 0.0320 | -1.14 |
| LIM homeobox 1                                             | LHX1     | 0.0372 | -1.14 |
| Olfactory receptor, family 2, subfamily B, member 3        | OR2B3    | 0.0049 | -1.14 |
| Chromosome 12 open reading frame 42                        | C12orf42 | 0.0233 | -1.14 |
| Endogenous retrovirus group V, member 1                    | ERVV-1   | 0.0047 | -1.14 |
| Cold shock domain containing C2, RNA binding               | CSDC2    | 0.0222 | -1.14 |
| Olfactory receptor, family 2, subfamily G, member 6        | OR2G6    | 0.0308 | -1.14 |
| Calcitonin-related polypeptide beta                        | CALCB    | 0.0385 | -1.14 |
| POU class 1 homeobox 1                                     | POU1F1   | 0.0343 | -1.14 |
| Thymosin beta 15a                                          | TMSB15A  | 0.0222 | -1.14 |
| Killer cell lectin-like receptor subfamily A pseudogene 1  | KLRAP1   | 0.0197 | -1.14 |
| Chromosome 9 open reading frame 92                         | C9orf92  | 0.0054 | -1.14 |
| SP100 nuclear antigen                                      | SP100    | 0.0221 | -1.14 |
| Tetratricopeptide repeat domain 21B                        | TTC21B   | 0.0048 | -1.14 |
| CCR4-NOT transcription complex subunit 6                   | CNOT6    | 0.0205 | -1.14 |
| EGF containing fibulin-like extracellular matrix protein 1 | EFEMP1   | 0.0287 | -1.14 |
| Adaptor-related protein complex 4, epsilon 1 subunit       | AP4E1    | 0.0113 | -1.14 |
| Dihydropyrimidinase                                        | DPYS     | 0.0337 | -1.14 |
| Transcript Identified by aceview, Entrez Gene ID(s)        | TM2D1    | 0.0386 | -1.14 |
| Protein phosphatase, Mg <sup>2+</sup>                      | PPM1B    | 0.0169 | -1.14 |
| SH3-domain GRB2-like endophilin B1                         | SH3GLB1  | 0.0490 | -1.14 |
| KH homology domain containing 1                            | KHDC1    | 0.0313 | -1.14 |
| Memczak2013 ANTISENSE, coding, INTERNAL, intronic best tr  | DLGAP1   | 0.0121 | -1.14 |
| Ribonuclease, rnase A family, 1 (pancreatic)               | RNASE1   | 0.0492 | -1.14 |
| Membrane protein, palmitoylated 6                          | MPP6     | 0.0291 | -1.14 |
| ORMDL sphingolipid biosynthesis regulator 3                | ORMDL3   | 0.0090 | -1.14 |

|                                                                   |           |        |       |
|-------------------------------------------------------------------|-----------|--------|-------|
| Matrix metalloproteinase 27                                       | MMP27     | 0.0095 | -1.14 |
| Kinesin family member 15                                          | KIF15     | 0.0216 | -1.14 |
| LDL receptor related protein 6                                    | LRP6      | 0.0241 | -1.14 |
| Trna methyltransferase 12 homolog<br>(S. Cerevisiae)              | TRMT12    | 0.0326 | -1.14 |
| Cyclin-dependent kinase inhibitor<br>1B (p27, Kip1)               | CDKN1B    | 0.0321 | -1.14 |
| Sorting nexin 24                                                  | SNX24     | 0.0350 | -1.14 |
| Glutamate receptor, ionotropic,<br>delta 1                        | GRID1     | 0.0463 | -1.14 |
| Additional sex combs like<br>transcriptional regulator 2          | ASXL2     | 0.0476 | -1.14 |
| Family with sequence similarity 19<br>(chemokine (C-C motif)-li   | FAM19A3   | 0.0204 | -1.14 |
| Keratin associated protein 20-4                                   | KRTAP20-4 | 0.0473 | -1.14 |
| Mannosidase, endo-alpha                                           | MANEA     | 0.0379 | -1.14 |
| Polymerase (DNA directed) kappa                                   | POLK      | 0.0496 | -1.14 |
| Zinc finger, CW type with PWWP<br>domain 1                        | ZCWPW1    | 0.0162 | -1.14 |
| Transmembrane 4 L six family<br>member 18                         | TM4SF18   | 0.0179 | -1.14 |
| Retinal pigment epithelium-specific<br>protein 65kda              | RPE65     | 0.0318 | -1.14 |
| SEC24 homolog B, COPII coat<br>complex component                  | SEC24B    | 0.0442 | -1.14 |
| Regulator of G-protein signaling 4                                | RGS4      | 0.0493 | -1.14 |
| Cytochrome c oxidase subunit viib                                 | COX7B     | 0.0447 | -1.14 |
| Transmembrane protein 26                                          | TMEM26    | 0.0117 | -1.14 |
| DEAD (Asp-Glu-Ala-Asp) box<br>polypeptide 60                      | DDX60     | 0.0034 | -1.14 |
| Chromosome X open reading frame<br>58                             | CXorf58   | 0.0037 | -1.14 |
| Tetratricopeptide repeat domain<br>23-like                        | TTC23L    | 0.0209 | -1.14 |
| Transmembrane protein 108                                         | TMEM108   | 0.0299 | -1.14 |
| Olfactory receptor, family 52,<br>subfamily H, member 1           | OR52H1    | 0.0321 | -1.14 |
| GA binding protein transcription<br>factor alpha subunit          | GABPA     | 0.0130 | -1.14 |
| Kallikrein related peptidase 12                                   | KLK12     | 0.0412 | -1.14 |
| PHD finger protein 8                                              | PHF8      | 0.0279 | -1.14 |
| Zinc finger and BTB domain<br>containing 5                        | ZBTB5     | 0.0113 | -1.14 |
| Regulator of G-protein signaling 17                               | RGS17     | 0.0018 | -1.14 |
| Protein tyrosine phosphatase, non-<br>receptor type 22 (lymphoid) | PTPN22    | 0.0173 | -1.14 |
| Chromosome 16 open reading                                        | C16orf87  | 0.0035 | -1.14 |

frame 87

|                                                                   |          |        |       |
|-------------------------------------------------------------------|----------|--------|-------|
| Olfactory receptor, family 11, subfamily H, member 12             | OR11H12  | 0.0088 | -1.14 |
| Bromodomain adjacent to zinc finger domain 2B                     | BAZ2B    | 0.0287 | -1.14 |
| Solute carrier family 35 (GDP-fucose transporter), member C2      | SLC35C2  | 0.0310 | -1.14 |
| Chromosome 8 open reading frame 89                                | C8orf89  | 0.0098 | -1.15 |
| Chromosome 22 open reading frame 31                               | C22orf31 | 0.0229 | -1.15 |
| BTG family, member 3                                              | BTG3     | 0.0077 | -1.15 |
| Protocadherin beta 11                                             | PCDHB11  | 0.0255 | -1.15 |
| DDB1 and CUL4 associated factor 10                                | DCAF10   | 0.0293 | -1.15 |
| Tumor protein p63 regulated 1                                     | TPRG1    | 0.0457 | -1.15 |
| PDS5 cohesin associated factor B                                  | PDS5B    | 0.0303 | -1.15 |
| Centriolin                                                        | CNTRL    | 0.0095 | -1.15 |
| Glutamyl-prolyl-trna synthetase                                   | EPRS     | 0.0241 | -1.15 |
| Small ubiquitin-like modifier 4                                   | SUMO4    | 0.0166 | -1.15 |
| Poliovirus receptor-related 3                                     | PVRL3    | 0.0065 | -1.15 |
| Protein tyrosine phosphatase, non-receptor type 9                 | PTPN9    | 0.0465 | -1.15 |
| Zinc finger protein 319                                           | ZNF319   | 0.0438 | -1.15 |
| ADAM metallopeptidase with thrombospondin type 1 motif 13         | ADAMTS13 | 0.0418 | -1.15 |
| KIAA1143 [Source:HGNC Symbol;Acc:HGNC:29198]                      | KIAA1143 | 0.0110 | -1.15 |
| Dolichyldiphosphatase 1                                           | DOLPP1   | 0.0337 | -1.15 |
| Adhesion G protein-coupled receptor D1                            | ADGRD1   | 0.0469 | -1.15 |
| Potassium channel, voltage gated Shal related subfamily D, member | KCND3    | 0.0452 | -1.15 |
| Lipocalin 12                                                      | LCN12    | 0.0328 | -1.15 |
| Rho GDP dissociation inhibitor (GDI) beta                         | ARHGDI3  | 0.0346 | -1.15 |
| Chromosome 3 open reading frame 22                                | C3orf22  | 0.0460 | -1.15 |
| ELOVL fatty acid elongase 7                                       | ELOVL7   | 0.0354 | -1.15 |
| Core 1 synthase, glycoprotein-N-acetylgalactosamine 3-beta-gala   | C1GALT1  | 0.0034 | -1.15 |
| Growth hormone regulated TBC protein 1                            | GRTP1    | 0.0347 | -1.15 |
| DEAD (Asp-Glu-Ala-Asp) box polypeptide 18                         | DDX18    | 0.0021 | -1.15 |
| Transcription factor EC                                           | TFEC     | 0.0185 | -1.15 |
| Ring finger protein 5, E3 ubiquitin protein ligase                | RNF5     | 0.0103 | -1.15 |

|                                                                        |               |                  |                |
|------------------------------------------------------------------------|---------------|------------------|----------------|
| Sp3 transcription factor                                               | SP3           | 0.0406           | -1.15          |
| Memczak2013 ALT_ACCEPTOR,<br>ALT_DONOR, coding, INTERNAL, int<br>Delta | YWHAG<br>DNER | 0.0439<br>0.0307 | -1.15<br>-1.15 |
| Frizzled class receptor 3                                              | FZD3          | 0.0148           | -1.15          |
| 3-hydroxy-3-methylglutaryl-coa<br>reductase                            | HMGCR         | 0.0150           | -1.15          |
| Deleted in azoospermia-like                                            | DAZL          | 0.0365           | -1.15          |
| Thioredoxin                                                            | TXN           | 0.0192           | -1.15          |
| Itchy E3 ubiquitin protein ligase                                      | ITCH          | 0.0239           | -1.15          |
| Neurobeachin like 2                                                    | NBEAL2        | 0.0433           | -1.15          |
| Diacylglycerol kinase, zeta                                            | DGKZ          | 0.0199           | -1.15          |
| Glucosaminyl (N-acetyl) transferase<br>4, core 2                       | GCNT4         | 0.0308           | -1.15          |
| Beta-transducin repeat containing<br>E3 ubiquitin protein ligase       | BTRC          | 0.0072           | -1.15          |
| BEN domain containing 2                                                | BEND2         | 0.0072           | -1.15          |
| Proline rich 4 (lacrimal)                                              | PRR4          | 0.0031           | -1.15          |
| Histidine triad nucleotide binding<br>protein 2                        | HINT2         | 0.0116           | -1.15          |
| Synaptonemal complex protein 3                                         | SYCP3         | 0.0086           | -1.15          |
| Transient receptor potential cation<br>channel, subfamily M, member    | TRPM5         | 0.0069           | -1.15          |
| Autophagy related 16-like 1                                            | ATG16L1       | 0.0277           | -1.15          |
| Bromodomain adjacent to zinc<br>finger domain 1A                       | BAZ1A         | 0.0465           | -1.15          |
| Chromosome 2 open reading frame<br>88                                  | C2orf88       | 0.0402           | -1.15          |
| Adenosylhomocysteinase-like 2                                          | AHCYL2        | 0.0498           | -1.15          |
| Secreted frizzled-related protein 4                                    | SFRP4         | 0.0170           | -1.15          |
| Dicer 1, ribonuclease type III                                         | DICER1        | 0.0071           | -1.15          |
| Synaptonemal complex protein 1                                         | SYCP1         | 0.0100           | -1.15          |
| Glycerophosphodiester<br>phosphodiesterase 1                           | GDE1          | 0.0381           | -1.15          |
| T-box 18                                                               | TBX18         | 0.0207           | -1.15          |
| Acyl-coa thioesterase 13                                               | ACOT13        | 0.0246           | -1.15          |
| ATP                                                                    | AGTPBP1       | 0.0044           | -1.15          |
| V-rel avian reticuloendotheliosis<br>viral oncogene homolog            | REL           | 0.0227           | -1.15          |
| TBC1 domain family, member 32                                          | TBC1D32       | 0.0066           | -1.15          |
| Ankyrin repeat and zinc finger<br>domain containing 1                  | ANKZF1        | 0.0344           | -1.15          |
| Transmembrane protein 136                                              | TMEM136       | 0.0191           | -1.15          |
| 5,3-nucleotidase, mitochondrial                                        | NT5M          | 0.0231           | -1.15          |
| CDC42 effector protein (Rho gtpase<br>binding) 5                       | CDC42EP5      | 0.0067           | -1.15          |
| Butyrophilin, subfamily 1, member                                      | BTN1A1        | 0.0198           | -1.15          |

## A1

|                                                               |            |        |       |
|---------------------------------------------------------------|------------|--------|-------|
| Fc receptor, iga, igm, high affinity                          | FCAMR      | 0.0356 | -1.15 |
| KCTD21 antisense RNA 1                                        | KCTD21-AS1 | 0.0237 | -1.15 |
| Defensin, beta 136                                            | DEFB136    | 0.0155 | -1.15 |
| Major facilitator superfamily domain containing 12            | MFSD12     | 0.0349 | -1.15 |
| MAX dimerization protein 4                                    | MXD4       | 0.0237 | -1.15 |
| Neuropeptide Y receptor Y1                                    | NPY1R      | 0.0170 | -1.15 |
| Small nuclear ribonucleoprotein D2 pseudogene 2               | SNRPD2P2   | 0.0035 | -1.15 |
| TAR DNA binding protein                                       | TARDBP     | 0.0034 | -1.15 |
| Zinc finger, DHHC-type containing 2                           | ZDHHC2     | 0.0460 | -1.15 |
| Transcript Identified by aceview, Entrez Gene ID(s) 238       | ALK        | 0.0067 | -1.15 |
| Jeck2013 ALT_ACCEPTOR, ALT_DONOR, coding, INTERNAL, intron    | SMYD3      | 0.0065 | -1.15 |
| Olfactory receptor, family 5, subfamily AU, member 1          | OR5AU1     | 0.0344 | -1.15 |
| Dmx-like 2                                                    | DMXL2      | 0.0045 | -1.15 |
| Zinc finger protein 584                                       | ZNF584     | 0.0226 | -1.15 |
| Tau tubulin kinase 2                                          | TTBK2      | 0.0416 | -1.15 |
| HSPA (heat shock 70kda) binding protein, cytoplasmic cochaper | HSPBP1     | 0.0383 | -1.15 |
| FK506 binding protein 1B                                      | FKBP1B     | 0.0235 | -1.16 |
| Nuclear factor, erythroid 2                                   | NFE2       | 0.0329 | -1.16 |
| Nucleolar protein 4-like                                      | NOL4L      | 0.0142 | -1.16 |
| Cytokine induced apoptosis inhibitor 1                        | CIAPIN1    | 0.0463 | -1.16 |
| Memczak2013 ALT_ACCEPTOR, ALT_DONOR, coding, INTERNAL, in     | CAMKMT     | 0.0333 | -1.16 |
| Protein kinase, camp-dependent, regulatory, type I, alpha     | PRKAR1A    | 0.0220 | -1.16 |
| Glutamate receptor, ionotropic, AMPA 1                        | GRIA1      | 0.0044 | -1.16 |
| Homer scaffolding protein 2                                   | HOMER2     | 0.0425 | -1.16 |
| Rho gtpase activating protein 18                              | ARHGAP18   | 0.0211 | -1.16 |
| Mastermind-like domain containing 1                           | MAMLD1     | 0.0400 | -1.16 |
| COP9 signalosome subunit 8                                    | COPS8      | 0.0411 | -1.16 |
| PTPRF interacting protein, binding protein 2 (liprin beta 2)  | PPFIBP2    | 0.0248 | -1.16 |
| Oxysterol binding protein-like 11                             | OSBPL11    | 0.0310 | -1.16 |
| Lanc lantibiotic synthetase component C-like 1 (bacterial)    | LANCL1     | 0.0038 | -1.16 |
| PAP associated domain containing 5                            | PAPD5      | 0.0276 | -1.16 |
| Lysine (K)-specific methyltransferase                         | KMT5A      | 0.0114 | -1.16 |



## 5A

|                                                             |              |        |       |
|-------------------------------------------------------------|--------------|--------|-------|
| Olfactory receptor, family 5, subfamily D, member 18        | OR5D18       | 0.0004 | -1.16 |
| Chromosome 1 open reading frame 35                          | C1orf35      | 0.0226 | -1.16 |
| Olfactory receptor, family 10, subfamily R, member 2        | OR10R2       | 0.0410 | -1.16 |
| Nuclear pore complex interacting protein family, member B11 | NPIPB11      | 0.0124 | -1.16 |
| Sorting nexin 5                                             | SNX5         | 0.0206 | -1.16 |
| WD repeat domain 75                                         | WDR75        | 0.0115 | -1.16 |
| Putative uncharacterized protein FLJ37770-like              | LOC100506127 | 0.0207 | -1.16 |
| Family with sequence similarity 81, member A                | FAM81A       | 0.0019 | -1.16 |
| Calcium                                                     | CAMK2D       | 0.0352 | -1.16 |
| Syntrophin, gamma 1                                         | SNTG1        | 0.0337 | -1.16 |
| NYN domain and retroviral integrase containing              | NYNRIN       | 0.0040 | -1.16 |
| Olfactory receptor, family 10, subfamily AD, member 1       | OR10AD1      | 0.0279 | -1.16 |
| Glutamate receptor, ionotropic, N-methyl D-aspartate 2B     | GRIN2B       | 0.0452 | -1.16 |
| Ethylmalonic encephalopathy 1                               | ETHE1        | 0.0312 | -1.16 |
| Chloride channel, voltage-sensitive 3                       | CLCN3        | 0.0447 | -1.16 |
| F-box protein 32                                            | FBXO32       | 0.0321 | -1.16 |
| Hemopexin                                                   | HPX          | 0.0190 | -1.16 |
| Keratin 32, type I                                          | KRT32        | 0.0324 | -1.16 |
| Hydroxyacid oxidase (glycolate oxidase) 1                   | HAO1         | 0.0261 | -1.16 |
| Non-POU domain containing, octamer-binding                  | NONO         | 0.0071 | -1.16 |
| Transcript Identified by aceview, Entrez Gene ID(s)         | GRIN2A       | 0.0199 | -1.16 |
| Dual specificity phosphatase 15                             | DUSP15       | 0.0174 | -1.16 |
| Fibroblast growth factor 12                                 | FGF12        | 0.0384 | -1.16 |
| Lamin B1                                                    | LMNB1        | 0.0238 | -1.16 |
| Proteasome activator subunit 3                              | PSME3        | 0.0461 | -1.16 |
| Nucleosome assembly protein 1-like 6                        | NAP1L6       | 0.0187 | -1.16 |
| Nucleophosmin                                               | NPM3         | 0.0315 | -1.16 |
| ADP-ribosylation factor like gtpase 5C                      | ARL5C        | 0.0241 | -1.16 |
| Histone cluster 1, h2bi                                     | HIST1H2BI    | 0.0154 | -1.16 |
| Zinc finger and SCAN domain containing 4                    | ZSCAN4       | 0.0200 | -1.16 |

|                                                                                                    |                |        |       |
|----------------------------------------------------------------------------------------------------|----------------|--------|-------|
| Tripartite motif containing 55                                                                     | TRIM55         | 0.0344 | -1.16 |
| Synovial sarcoma, X breakpoint 6 (pseudogene)                                                      | SSX6           | 0.0218 | -1.16 |
| Transmembrane protein 192                                                                          | TMEM192        | 0.0083 | -1.16 |
| RAD51 paralog C                                                                                    | RAD51C         | 0.0281 | -1.16 |
| DENN                                                                                               | DENND2C        | 0.0446 | -1.16 |
| Secretogranin III                                                                                  | SCG3           | 0.0100 | -1.16 |
| Pantothenate kinase 1                                                                              | PANK1          | 0.0427 | -1.16 |
| Exportin 1                                                                                         | XPO1           | 0.0060 | -1.16 |
| Zinc finger protein 197                                                                            | ZNF197         | 0.0207 | -1.16 |
| Zinc finger protein 37A                                                                            | ZNF37A         | 0.0219 | -1.16 |
| Zinc finger protein 571                                                                            | ZNF571         | 0.0120 | -1.16 |
| Serpin peptidase inhibitor, clade A (alpha-1 antiproteinase, a Sulfotransferase family 1E member 1 | SERPINA6       | 0.0208 | -1.16 |
| DEAD (Asp-Glu-Ala-Asp) box polypeptide 27                                                          | SULT1E1        | 0.0207 | -1.16 |
| Phosphoglucomutase 2-like 1                                                                        | DDX27          | 0.0096 | -1.16 |
| Acidic nuclear phosphoprotein 32 family member D                                                   | PGM2L1         | 0.0143 | -1.16 |
| Protein tyrosine phosphatase, mitochondrial 1                                                      | ANP32D         | 0.0120 | -1.16 |
| Cerebellin 4 precursor                                                                             | PTPMT1         | 0.0191 | -1.16 |
| ARP1 actin-related protein 1 homolog B, centractin beta (yeast)                                    | CBLN4          | 0.0077 | -1.16 |
| Sperm mitochondria-associated cysteine-rich protein                                                | ACTR1B         | 0.0280 | -1.16 |
| FYVE, rhogef and PH domain containing 6                                                            | SMCP           | 0.0091 | -1.16 |
| R3H domain containing 2                                                                            | FGD6           | 0.0028 | -1.16 |
| Leucine rich repeat containing 59                                                                  | R3HDM2         | 0.0269 | -1.17 |
| Signal-regulatory protein gamma                                                                    | LRRCS9         | 0.0213 | -1.17 |
| Phosphofructokinase, platelet                                                                      | SIRPG          | 0.0232 | -1.17 |
| Lectin, galactoside-binding-like                                                                   | PFKP           | 0.0077 | -1.17 |
| FYN binding protein                                                                                | LGALSL         | 0.0435 | -1.17 |
| Zinc finger and BTB domain containing 14                                                           | FYB            | 0.0328 | -1.17 |
| SIX homeobox 4                                                                                     | ZBTB14         | 0.0119 | -1.17 |
| ZBED6 C-terminal like                                                                              | SIX4           | 0.0138 | -1.17 |
| Protein phosphatase 1, regulatory subunit 17                                                       | ZBED6CL        | 0.0232 | -1.17 |
| Tryptase delta 1                                                                                   | PPP1R17        | 0.0421 | -1.17 |
| Ankyrin repeat domain 1 (cardiac muscle)                                                           | TPSD1          | 0.0278 | -1.17 |
| PTGES3L-AARSD1 readthrough                                                                         | ANKRD1         | 0.0192 | -1.17 |
|                                                                                                    | PTGES3L-AARSD1 | 0.0337 | -1.17 |

|                                                           |           |        |       |
|-----------------------------------------------------------|-----------|--------|-------|
| Ras-related GTP binding B                                 | RRAGB     | 0.0180 | -1.17 |
| Protocadherin beta 15                                     | PCDHB15   | 0.0252 | -1.17 |
| Mbt domain containing 1                                   | MBTD1     | 0.0120 | -1.17 |
| TATA box binding protein associated factor 7 like         | TAF7L     | 0.0431 | -1.17 |
| Meiosis specific with OB domains                          | MEIOB     | 0.0105 | -1.17 |
| Praja ring finger 2, E3 ubiquitin protein ligase          | PJA2      | 0.0046 | -1.17 |
| Transmembrane protein 114                                 | TMEM114   | 0.0276 | -1.17 |
| Lymphocyte-specific protein 1 pseudogene 3                | LSP1P3    | 0.0311 | -1.17 |
| Lipocalin 8                                               | LCN8      | 0.0363 | -1.17 |
| Transcript Identified by aceview, Entrez Gene ID(s) 6     | TBCD      | 0.0268 | -1.17 |
| Patched domain containing 3                               | PTCHD3    | 0.0253 | -1.17 |
| Mediator complex subunit 23                               | MED23     | 0.0232 | -1.17 |
| Leucine rich repeat containing 8 family, member C         | LRRC8C    | 0.0413 | -1.17 |
| Kelch-like family member 18                               | KLHL18    | 0.0206 | -1.17 |
| WAPL cohesin release factor                               | WAPL      | 0.0180 | -1.17 |
| Ubiquitin specific peptidase 32 pseudogene 2              | USP32P2   | 0.0283 | -1.17 |
| Transmembrane protease, serine 11A                        | TMPRSS11A | 0.0064 | -1.17 |
| BCL2-related protein A1                                   | BCL2A1    | 0.0185 | -1.17 |
| Peptidyl arginine deiminase, type VI                      | PADI6     | 0.0236 | -1.17 |
| S100 calcium binding protein A12                          | S100A12   | 0.0168 | -1.17 |
| Exosome component 6                                       | EXOSC6    | 0.0338 | -1.17 |
| Integrator complex subunit 3                              | INTS3     | 0.0194 | -1.17 |
| Factor interacting with PAPOLA and CPSF1                  | FIP1L1    | 0.0140 | -1.17 |
| RNA binding motif protein 41                              | RBM41     | 0.0036 | -1.17 |
| Chromosome 1 open reading frame 52                        | C1orf52   | 0.0201 | -1.17 |
| Neuroblastoma breakpoint family, member 14                | NBPF14    | 0.0181 | -1.17 |
| Chromosome 4 open reading frame 32                        | C4orf32   | 0.0053 | -1.17 |
| TGFB-induced factor homeobox 1                            | TGIF1     | 0.0222 | -1.17 |
| Memczak2013 ANTISENSE, CDS, coding, INTERNAL best transcr | ATP2A3    | 0.0359 | -1.17 |
| Defensin, beta 108B                                       | DEFB108B  | 0.0236 | -1.17 |
| Protein phosphatase 1, regulatory subunit 16A             | PPP1R16A  | 0.0230 | -1.17 |
| POU class 5 homeobox 1B                                   | POU5F1B   | 0.0437 | -1.17 |
| Adhesion molecule, interacts with CXADR antigen 1         | AMICA1    | 0.0475 | -1.17 |

|                                                                                                |          |        |       |
|------------------------------------------------------------------------------------------------|----------|--------|-------|
| Transcript Identified by aceview,<br>Entrez Gene ID(                                           | ARPP21   | 0.0195 | -1.17 |
| RAB guanine nucleotide exchange<br>factor (GEF) 1                                              | RABGEF1  | 0.0228 | -1.17 |
| Synapsin I                                                                                     | SYN1     | 0.0304 | -1.17 |
| TAO kinase 1                                                                                   | TAOK1    | 0.0099 | -1.17 |
| Polymerase (DNA directed), alpha 2,<br>accessory subunit                                       | POLA2    | 0.0104 | -1.17 |
| Nurim (nuclear envelope membrane<br>protein)                                                   | NRM      | 0.0140 | -1.17 |
| Sterile alpha motif domain<br>containing 8                                                     | SAMD8    | 0.0317 | -1.17 |
| Growth hormone releasing<br>hormone                                                            | GHRH     | 0.0402 | -1.17 |
| Nucleolar protein 4                                                                            | NOL4     | 0.0068 | -1.17 |
| Protein tyrosine phosphatase,<br>receptor type, f polypeptide (PTPR<br>SH2 domain containing 7 | PPFIA3   | 0.0230 | -1.17 |
| Thiopurine S-methyltransferase                                                                 | SH2D7    | 0.0188 | -1.18 |
| Myosin light chain 10                                                                          | TPMT     | 0.0186 | -1.18 |
| Transcript Identified by aceview,<br>Entrez Gene ID(s) 55                                      | MYL10    | 0.0119 | -1.18 |
| Dedicator of cytokinesis 4                                                                     | EPN3     | 0.0431 | -1.18 |
| RAB34, member RAS oncogene<br>family                                                           | DOCK4    | 0.0021 | -1.18 |
| Hypermethylated in cancer 2                                                                    | RAB34    | 0.0400 | -1.18 |
| Transmembrane protein 170B                                                                     | HIC2     | 0.0073 | -1.18 |
| Mediator of DNA-damage<br>checkpoint 1                                                         | TMEM170B | 0.0283 | -1.18 |
| Transient receptor potential cation<br>channel, subfamily C, memb                              | MDC1     | 0.0393 | -1.18 |
| Dual specificity tyrosine-(Y)-<br>phosphorylation regulated ki                                 | TRPC7    | 0.0108 | -1.18 |
| Aspartylglucosaminidase                                                                        | DYRK1B   | 0.0496 | -1.18 |
| Spindle apparatus coiled-coil<br>protein 1                                                     | AGA      | 0.0115 | -1.18 |
| SRY box 6                                                                                      | SPDL1    | 0.0081 | -1.18 |
| Phosphoribosyl pyrophosphate<br>synthetase 1                                                   | SOX6     | 0.0293 | -1.18 |
| BUD13 homolog                                                                                  | PRPS1    | 0.0046 | -1.18 |
| Forkhead box A1                                                                                | BUD13    | 0.0144 | -1.18 |
| Radixin                                                                                        | FOXA1    | 0.0292 | -1.18 |
| Translocase of outer mitochondrial<br>membrane 70 homolog A (S. Ce                             | RDX      | 0.0178 | -1.18 |
| Transmembrane protein 213                                                                      | TOMM70A  | 0.0109 | -1.18 |
| Solute carrier family 4 (sodium<br>bicarbonate cotransporter), m                               | TMEM213  | 0.0394 | -1.18 |
|                                                                                                | SLC4A4   | 0.0189 | -1.18 |

|                                                                |          |        |       |
|----------------------------------------------------------------|----------|--------|-------|
| Chromosome 2 open reading frame 49                             | C2orf49  | 0.0094 | -1.18 |
| Frequently rearranged in advanced T-cell lymphomas 1           | FRAT1    | 0.0355 | -1.18 |
| Collagen, type XVII, alpha 1                                   | COL17A1  | 0.0090 | -1.18 |
| Muscular LMNA-interacting protein                              | MLIP     | 0.0186 | -1.18 |
| Superoxide dismutase 3, extracellular                          | SOD3     | 0.0370 | -1.18 |
| Olfactory receptor, family 2, subfamily T, member 35           | OR2T35   | 0.0157 | -1.18 |
| TRAF-type zinc finger domain containing 1                      | TRAFD1   | 0.0127 | -1.18 |
| FXD domain containing ion transport regulator 5                | FXD5     | 0.0436 | -1.18 |
| Synaptoporin                                                   | SYNPR    | 0.0164 | -1.18 |
| Phosphatidylinositol glycan anchor biosynthesis class G        | PIGG     | 0.0200 | -1.18 |
| Family with sequence similarity 157, member A                  | FAM157A  | 0.0303 | -1.18 |
| Forkhead box J3                                                | FOXJ3    | 0.0055 | -1.18 |
| Coiled-coil domain containing 138                              | CCDC138  | 0.0133 | -1.18 |
| Zinc finger protein 526                                        | ZNF526   | 0.0050 | -1.18 |
| Chromogranin B                                                 | CHGB     | 0.0244 | -1.18 |
| S-antigen; retina and pineal gland (arrestin)                  | SAG      | 0.0225 | -1.18 |
| Growth arrest-specific 2                                       | GAS2     | 0.0157 | -1.18 |
| Sema domain, transmembrane domain (TM), and cytoplasmic domain | SEMA6D   | 0.0316 | -1.18 |
| Peptidylprolyl isomerase B (cyclophilin B)                     | PPIB     | 0.0083 | -1.18 |
| G protein-coupled receptor 155                                 | GPR155   | 0.0053 | -1.18 |
| Heparanase 2 (inactive)                                        | HPSE2    | 0.0117 | -1.18 |
| LDL receptor related protein 6                                 | LRP6     | 0.0042 | -1.18 |
| PDZ and LIM domain 4                                           | PDLIM4   | 0.0196 | -1.18 |
| Adaptor-related protein complex 3, sigma 2 subunit             | AP3S2    | 0.0366 | -1.18 |
| ATP                                                            | AGBL4    | 0.0076 | -1.18 |
| Structural maintenance of chromosomes 5                        | SMC5     | 0.0072 | -1.19 |
| Prostate and testis expressed 4                                | PATE4    | 0.0445 | -1.19 |
| Histone cluster 1, H1d                                         | HIST1H1D | 0.0276 | -1.19 |
| Calcium channel, voltage-dependent, beta 1 subunit             | CACNB1   | 0.0144 | -1.19 |
| Protein tyrosine phosphatase, receptor type, T                 | PTPRT    | 0.0114 | -1.19 |
| Methylenetetrahydrofolate dehydrogenase (NADP+ dependent)      | MTHFD2   | 0.0014 | -1.19 |

|                                                            |              |        |       |
|------------------------------------------------------------|--------------|--------|-------|
| 2, met                                                     |              |        |       |
| Torsin family 1, member A (torsin A)                       | TOR1A        | 0.0084 | -1.19 |
| Transcriptional regulating factor 1                        | TRERF1       | 0.0228 | -1.19 |
| Myeloid                                                    | MLLT1        | 0.0409 | -1.19 |
| Ral gtpase activating protein, alpha subunit 2 (catalytic) | RALGAPA2     | 0.0140 | -1.19 |
| Immunoglobulin superfamily, member 8                       | IGSF8        | 0.0091 | -1.19 |
| Ubiquitin-conjugating enzyme E2D 4 (putative)              | UBE2D4       | 0.0052 | -1.19 |
| Family with sequence similarity 185, member A              | FAM185A      | 0.0100 | -1.19 |
| Kinesin family member 22                                   | KIF22        | 0.0334 | -1.19 |
| Mediator complex subunit 20                                | MED20        | 0.0313 | -1.19 |
| Sphingomyelin phosphodiesterase, acid-like 3A              | SMPDL3A      | 0.0083 | -1.19 |
| Chromosome X open reading frame 57                         | CXorf57      | 0.0134 | -1.19 |
| Ubiquitin specific peptidase 9, Y-linked                   | USP9Y        | 0.0331 | -1.19 |
| SOGA family member 3                                       | SOGA3        | 0.0180 | -1.19 |
| Coiled-coil domain containing 126                          | CCDC126      | 0.0136 | -1.19 |
| Peptidase inhibitor 15                                     | PI15         | 0.0134 | -1.19 |
| Memczak2013 ALT_ACCEPTOR, ALT_DONOR, coding, INTERNAL, int | CCND3        | 0.0294 | -1.19 |
| Enhancer of yellow 2 homolog (Drosophila)                  | ENY2         | 0.0070 | -1.19 |
| Cilia and flagella associated protein 47                   | CFAP47       | 0.0100 | -1.19 |
| SPATA31 subfamily D, member 3                              | SPATA31D3    | 0.0053 | -1.19 |
| Purinergic receptor P2Y, G-protein coupled, 13             | P2RY13       | 0.0403 | -1.19 |
| Polymerase (RNA) I polypeptide B                           | POLR1B       | 0.0060 | -1.19 |
| Neurotrophin 3                                             | NTF3         | 0.0273 | -1.19 |
| Nuclear transcription factor, X-box binding 1              | NFX1         | 0.0402 | -1.19 |
| FGR proto-oncogene, Src family tyrosine kinase             | FGR          | 0.0064 | -1.19 |
| Dishevelled associated activator of morphogenesis 1        | DAAM1        | 0.0091 | -1.19 |
| Nitric oxide synthase trafficking                          | NOSTRIN      | 0.0022 | -1.19 |
| Transcript Identified by aceview, Entrez Gene ID(s)        | THSD4        | 0.0235 | -1.19 |
| Doublecortin domain containing 2B                          | DCDC2B       | 0.0432 | -1.19 |
| G protein-coupled receptor 150                             | GPR150       | 0.0175 | -1.19 |
| Bromodomain, testis-specific                               | BRDT         | 0.0008 | -1.19 |
| Uncharacterized LOC101929319                               | LOC101929319 | 0.0089 | -1.19 |

|                                                                        |           |        |       |
|------------------------------------------------------------------------|-----------|--------|-------|
| Adenylate cyclase 4                                                    | ADCY4     | 0.0141 | -1.19 |
| ADNP homeobox 2                                                        | ADNP2     | 0.0105 | -1.19 |
| Transmembrane protein 67                                               | TMEM67    | 0.0037 | -1.19 |
| Olfactomedin like 3                                                    | OLFML3    | 0.0137 | -1.19 |
| N-acetylneuraminatase pyruvate lyase<br>(dihydrodipicolinate synthase) | NPL       | 0.0068 | -1.19 |
| Olfactory receptor, family 7,<br>subfamily A, member 10                | OR7A10    | 0.0072 | -1.19 |
| Keratin associated protein 3-1                                         | KRTAP3-1  | 0.0496 | -1.19 |
| Discoidin domain receptor tyrosine<br>kinase 1                         | DDR1      | 0.0175 | -1.19 |
| Thrombopoietin                                                         | THPO      | 0.0098 | -1.19 |
| Coiled-coil domain containing 175                                      | CCDC175   | 0.0070 | -1.19 |
| Acetyl-coa acyltransferase 1                                           | ACAA1     | 0.0062 | -1.19 |
| Coiled-coil domain containing 34                                       | CCDC34    | 0.0279 | -1.20 |
| G protein-coupled receptor 31                                          | GPR31     | 0.0463 | -1.20 |
| PRAME family member 6<br>[Source:HGNC<br>Symbol;Acc:HGNC:30583]        | PRAMEF6   | 0.0320 | -1.20 |
| PRAME family member 6<br>[Source:HGNC<br>Symbol;Acc:HGNC:30583]        | PRAMEF6   | 0.0320 | -1.20 |
| CD109 molecule                                                         | CD109     | 0.0034 | -1.20 |
| Synergisin, gamma                                                      | SYNRG     | 0.0070 | -1.20 |
| Stearoyl-coa desaturase 5                                              | SCD5      | 0.0163 | -1.20 |
| Trafficking protein particle complex<br>2-like                         | TRAPPC2L  | 0.0317 | -1.20 |
| Regulator of microtubule dynamics<br>3                                 | RMDN3     | 0.0099 | -1.20 |
| Ankyrin repeat domain 20 family,<br>member A1                          | ANKRD20A1 | 0.0234 | -1.20 |
| SHANK-associated RH domain<br>interactor                               | SHARPIN   | 0.0271 | -1.20 |
| KIAA1644                                                               | KIAA1644  | 0.0179 | -1.20 |
| Prostate and testis expressed 1                                        | PATE1     | 0.0056 | -1.20 |
| Myelin protein zero-like 2                                             | MPZL2     | 0.0171 | -1.20 |
| Collagen, type XX, alpha 1                                             | COL20A1   | 0.0056 | -1.20 |
| Neuropeptide FF receptor 1                                             | NPFPR1    | 0.0052 | -1.20 |
| Coiled-coil domain containing 129                                      | CCDC129   | 0.0013 | -1.20 |
| RAD21 cohesin complex component<br>like 1                              | RAD21L1   | 0.0074 | -1.20 |
| Rho guanine nucleotide exchange<br>factor (GEF) 12                     | ARHGEF12  | 0.0133 | -1.20 |
| Kelch-like family member 42                                            | KLHL42    | 0.0124 | -1.20 |
| Myomesin 3                                                             | MYOM3     | 0.0161 | -1.20 |
| Family with sequence similarity 124<br>member B                        | FAM124B   | 0.0113 | -1.20 |

|                                                           |            |        |       |
|-----------------------------------------------------------|------------|--------|-------|
| Plexin D1                                                 | PLXND1     | 0.0305 | -1.20 |
| Transcript Identified by aceview,<br>Entrez Gene ID(s) 13 | UBR3       | 0.0235 | -1.20 |
| ADP-ribosylation factor like gtpase<br>5B                 | ARL5B      | 0.0205 | -1.20 |
| TBC1 domain family, member 13                             | TBC1D13    | 0.0460 | -1.20 |
| Matrix metalloproteinase 19                               | MMP19      | 0.0092 | -1.20 |
| Essential meiotic structure-specific<br>endonuclease 1    | EME1       | 0.0120 | -1.20 |
| Zinc finger protein 627                                   | ZNF627     | 0.0274 | -1.20 |
| Transcript Identified by aceview,<br>Entrez Gene ID(s) 65 | HLTF       | 0.0312 | -1.20 |
| 5-phosphohydroxy-L-lysine<br>phospho-lyase                | PHYKPL     | 0.0457 | -1.20 |
| Leucine rich repeat containing 39                         | LRRC39     | 0.0004 | -1.20 |
| Slingshot protein phosphatase 2                           | SSH2       | 0.0163 | -1.20 |
| G protein-coupled receptor 42<br>(gene                    | GPR42      | 0.0339 | -1.20 |
| Synaptosome associated protein<br>29kda                   | SNAP29     | 0.0317 | -1.20 |
| Chromosome 2 open reading frame<br>80                     | C2orf80    | 0.0018 | -1.20 |
| Transcript Identified by aceview,<br>Entrez Gene ID(s)    | TRABD      | 0.0112 | -1.20 |
| Patatin-like phospholipase domain<br>containing 2         | PNPLA2     | 0.0265 | -1.20 |
| Transcript Identified by aceview,<br>Entrez Gene ID(s) 41 | CD46       | 0.0061 | -1.20 |
| RBM14-RBM4 readthrough                                    | RBM14-RBM4 | 0.0244 | -1.20 |
| Long intergenic non-protein coding<br>RNA 337             | LINC00337  | 0.0065 | -1.20 |
| Dnaj (Hsp40) homolog, subfamily B,<br>member 12           | DNAJB12    | 0.0043 | -1.20 |
| G-rich RNA sequence binding factor<br>1                   | GRSF1      | 0.0019 | -1.20 |
| Chromosome 9 open reading frame<br>106                    | C9orf106   | 0.0017 | -1.20 |
| Olfactory receptor, family 5,<br>subfamily AC, member 2   | OR5AC2     | 0.0053 | -1.20 |
| Transcript Identified by aceview,<br>Entrez Gene ID(s)    | WDR26      | 0.0030 | -1.20 |
| Chromosome 7 open reading frame<br>60                     | C7orf60    | 0.0032 | -1.20 |
| Coagulation factor XI                                     | F11        | 0.0337 | -1.20 |
| Zinc finger with KRAB and SCAN<br>domains 3               | ZKSCAN3    | 0.0019 | -1.20 |
| Splicing factor proline                                   | SFPQ       | 0.0073 | -1.20 |



|                                                                  |         |        |       |
|------------------------------------------------------------------|---------|--------|-------|
| F-box protein 44                                                 | FBXO44  | 0.0119 | -1.20 |
| IZUMO family member 3                                            | IZUMO3  | 0.0034 | -1.20 |
| Zinc finger protein 780A                                         | ZNF780A | 0.0004 | -1.20 |
| Crystallin beta A4                                               | CRYBA4  | 0.0377 | -1.21 |
| Fatty acid desaturase 3                                          | FADS3   | 0.0343 | -1.21 |
| Transmembrane protein 159                                        | TMEM159 | 0.0031 | -1.21 |
| Dorsal inhibitory axon guidance protein                          | DRAXIN  | 0.0055 | -1.21 |
| Nuclear pore complex interacting protein family, member B8       | NPIPB8  | 0.0103 | -1.21 |
| Phosphatase and actin regulator 3                                | PHACTR3 | 0.0141 | -1.21 |
| Polymerase (DNA directed), eta                                   | POLH    | 0.0144 | -1.21 |
| Golgi glycoprotein 1                                             | GLG1    | 0.0212 | -1.21 |
| 5,10-methenyltetrahydrofolate synthetase (5-formyltetrahydrofo   | MTHFS   | 0.0112 | -1.21 |
| Sema domain, immunoglobulin domain (Ig), transmembrane domain (T | SEMA4B  | 0.0017 | -1.21 |
| TAF1 RNA polymerase II, TATA box binding protein (TBP)-associat  | TAF1    | 0.0030 | -1.21 |
| Dual specificity tyrosine-(Y)-phosphorylation regulated kinase   | DYRK4   | 0.0168 | -1.21 |
| Cerberus 1, DAN family BMP antagonist                            | CER1    | 0.0077 | -1.21 |
| Eukaryotic translation initiation factor 2 alpha kinase 4        | EIF2AK4 | 0.0082 | -1.21 |
| Angiopoietin 1                                                   | ANGPT1  | 0.0012 | -1.21 |
| Signal recognition particle receptor (docking protein)           | SRPR    | 0.0118 | -1.21 |
| Leucyl-trna synthetase 2, mitochondrial                          | LARS2   | 0.0099 | -1.21 |
| IQ motif containing C                                            | IQCC    | 0.0237 | -1.21 |
| Four and a half LIM domains 2                                    | FHL2    | 0.0152 | -1.21 |
| Palmdelphin                                                      | PALMD   | 0.0187 | -1.21 |
| Olfactory receptor, family 3, subfamily A, member 3              | OR3A3   | 0.0435 | -1.21 |
| Ribosomal protein S6 kinase, 90kda, polypeptide 3                | RPS6KA3 | 0.0003 | -1.21 |
| Zinc finger protein 80                                           | ZNF80   | 0.0155 | -1.21 |
| Ubiquitin specific peptidase 2                                   | USP2    | 0.0095 | -1.21 |
| Memczak2013 ALT_ACCEPTOR, ALT_DONOR, coding, INTERNAL, int       | CNPY3   | 0.0461 | -1.21 |
| Complement factor I                                              | CFI     | 0.0091 | -1.21 |
| KRAB box domain containing 1                                     | KRBOX1  | 0.0009 | -1.21 |
| UXT antisense RNA 1                                              | UXT-AS1 | 0.0114 | -1.21 |
| Protein regulator of cytokinesis 1                               | PRC1    | 0.0299 | -1.22 |
| RNA binding motif protein 26                                     | RBM26   | 0.0014 | -1.22 |

|                                                                                      |          |        |       |
|--------------------------------------------------------------------------------------|----------|--------|-------|
| Gap junction protein alpha 1                                                         | GJA1     | 0.0169 | -1.22 |
| Nuclear factor of activated T-cells, cytoplasmic, calcineurin K1AA1211               | NFATC4   | 0.0027 | -1.22 |
| K1AA1211                                                                             | K1AA1211 | 0.0030 | -1.22 |
| DNA meiotic recombinase 1                                                            | DMC1     | 0.0006 | -1.22 |
| Surfeit 1                                                                            | SURF1    | 0.0268 | -1.22 |
| Motor neuron and pancreas homeobox 1                                                 | MNX1     | 0.0304 | -1.22 |
| Myosin, heavy chain 2, skeletal muscle, adult                                        | MYH2     | 0.0005 | -1.22 |
| Protein-L-isoaspartate (D-aspartate) O-methyltransferase                             | PCMT1    | 0.0035 | -1.22 |
| Zinc finger protein 337                                                              | ZNF337   | 0.0367 | -1.22 |
| Solute carrier family 7, member 6 opposite strand                                    | SLC7A6OS | 0.0085 | -1.22 |
| PDZ domain containing 11                                                             | PDZD11   | 0.0170 | -1.22 |
| Homeobox B7                                                                          | HOXB7    | 0.0025 | -1.22 |
| Troponin T type 2 (cardiac)                                                          | TNNT2    | 0.0034 | -1.22 |
| PRAME family member 6 [Source:HGNC Symbol;Acc:HGNC:30583]                            | PRAMEF6  | 0.0240 | -1.22 |
| Cytochrome P450, family 4, subfamily B, polypeptide 1                                | CYP4B1   | 0.0009 | -1.22 |
| Chromosome 1 open reading frame 131                                                  | C1orf131 | 0.0016 | -1.23 |
| Hemicentin 1                                                                         | HMCN1    | 0.0121 | -1.23 |
| Vertebrae development associated Transcript Identified by aceview, Entrez Gene ID(s) | VRTN     | 0.0130 | -1.23 |
| MTMR6                                                                                | MTMR6    | 0.0220 | -1.23 |
| Memczak2013 ANTISENSE, CDS, coding, INTERNAL best transcri                           | MYADM    | 0.0387 | -1.23 |
| Zhang2013 ALT_ACCEPTOR, ALT_DONOR, coding, INTERNAL, intron                          | NINL     | 0.0140 | -1.23 |
| Transcript Identified by aceview, Entrez Gene ID(s)                                  | ALG13    | 0.0117 | -1.23 |
| Cartilage intermediate layer protein, nucleotide pyrophosphohydrol                   | CILP     | 0.0027 | -1.23 |
| Golgi-associated, gamma adaptin ear containing, ARF binding protei                   | GGA2     | 0.0035 | -1.23 |
| Mitochondrial ribosomal protein L54                                                  | MRPL54   | 0.0063 | -1.23 |
| Interleukin 16                                                                       | IL16     | 0.0080 | -1.24 |
| Upregulator of cell proliferation                                                    | URGCP    | 0.0050 | -1.24 |
| Jeck2013 ANTISENSE, coding, INTERNAL, intronic best transc                           | KIFC3    | 0.0081 | -1.24 |
| Myoregulin                                                                           | MRLN     | 0.0046 | -1.24 |

|                                                                  |               |        |       |
|------------------------------------------------------------------|---------------|--------|-------|
| Gastrin-releasing peptide                                        | GRP           | 0.0013 | -1.24 |
| RAS (RAD and GEM)-like GTP-binding 1                             | REM1          | 0.0072 | -1.24 |
| Hypoxia up-regulated 1                                           | HYOU1         | 0.0058 | -1.24 |
| Monoacylglycerol O-acyltransferase 2                             | MOGAT2        | 0.0046 | -1.24 |
| Retinoic acid receptor responder (tazarotene induced) 3          | RARRES3       | 0.0095 | -1.24 |
| Potassium channel, two pore domain subfamily K, member 2         | KCNK2         | 0.0106 | -1.24 |
| Sorting nexin 1                                                  | SNX1          | 0.0064 | -1.24 |
| Chromosome 12 open reading frame 60                              | C12orf60      | 0.0022 | -1.24 |
| RNA binding protein with multiple splicing 2                     | RBPMS2        | 0.0090 | -1.24 |
| ZNF559-ZNF177 readthrough                                        | ZNF559-ZNF177 | 0.0008 | -1.24 |
| Cerebellar degeneration related protein 2                        | CDR2          | 0.0125 | -1.24 |
| Limbic system-associated membrane protein                        | LSAMP         | 0.0124 | -1.25 |
| Immunoglobulin superfamily, member 21                            | IGSF21        | 0.0096 | -1.25 |
| IQ motif containing gtpase activating protein 2                  | IQGAP2        | 0.0083 | -1.25 |
| Ubiquitin specific peptidase 4 (proto-oncogene)                  | USP4          | 0.0127 | -1.25 |
| Transient receptor potential cation channel, subfamily V, member | TRPV6         | 0.0164 | -1.25 |
| Phosphatase and actin regulator 1                                | PHACTR1       | 0.0054 | -1.25 |
| Proteasome 26S subunit, non-atpase 14                            | PSMD14        | 0.0294 | -1.25 |
| Memczak2013 ALT_ACCEPTOR, ALT_DONOR, coding, INTERNAL, intr      | MSI2          | 0.0276 | -1.25 |
| Disrupted in renal carcinoma 3                                   | DIRC3         | 0.0164 | -1.25 |
| Chemokine (C-C motif) ligand 27                                  | CCL27         | 0.0346 | -1.26 |
| Gap junction protein gamma 2                                     | GJC2          | 0.0029 | -1.26 |
| Uncharacterized LOC100505478                                     | LOC100505478  | 0.0132 | -1.26 |
| Solute carrier family 22 (organic anion transporter), member     | SLC22A8       | 0.0104 | -1.26 |
| Memczak2013 ALT_ACCEPTOR, ALT_DONOR, INTERNAL, intronic, nc      | GAS8          | 0.0113 | -1.26 |
| Chromosome 11 open reading frame 87                              | C11orf87      | 0.0002 | -1.26 |
| Transcript Identified by aceview, Entrez Gene ID(s)              | NCOA7         | 0.0009 | -1.26 |
| CD79b molecule, immunoglobulin-associated beta                   | CD79B         | 0.0053 | -1.26 |

|                                                                  |         |        |       |
|------------------------------------------------------------------|---------|--------|-------|
| CXADR-like membrane protein                                      | CLMP    | 0.0390 | -1.26 |
| SAFB-like, transcription modulator                               | SLTM    | 0.0228 | -1.26 |
| TSPY-like 6                                                      | TSPYL6  | 0.0051 | -1.27 |
| Fibrillarin                                                      | FBL     | 0.0005 | -1.27 |
| Transcript Identified by aceview,<br>Entrez Gene I               | SLCO1A2 | 0.0002 | -1.27 |
| Transcript Identified by aceview,<br>Entrez Gene ID(             | TRIP12  | 0.0033 | -1.27 |
| Olfactory receptor, family 10,<br>subfamily J, member 3          | OR10J3  | 0.0012 | -1.27 |
| Component of oligomeric golgi<br>complex 1                       | COG1    | 0.0253 | -1.27 |
| Lectin, galactoside-binding, soluble,<br>16                      | LGALS16 | 0.0001 | -1.27 |
| Memczak2013 ANTISENSE, CDS,<br>coding, INTERNAL, intronic b      | SLC10A1 | 0.0193 | -1.28 |
| Family with sequence similarity 83,<br>member G                  | FAM83G  | 0.0018 | -1.28 |
| ADP-ribosyltransferase 3                                         | ART3    | 0.0017 | -1.28 |
| PR domain containing 6                                           | PRDM6   | 0.0007 | -1.28 |
| Microtubule associated tumor<br>suppressor 1                     | MTUS1   | 0.0020 | -1.28 |
| Neuroblastoma breakpoint family,<br>member 7                     | NBPF7   | 0.0000 | -1.28 |
| RFT1 homolog                                                     | RFT1    | 0.0003 | -1.29 |
| Solute carrier family 9, subfamily A<br>(NHE7, cation proton ant | SLC9A7  | 0.0001 | -1.31 |
| PRAME family member 5                                            | PRAMEF5 | 0.0002 | -1.31 |
| Neuronal regeneration related<br>protein                         | NREP    | 0.0005 | -1.33 |
| Transcript Identified by aceview,<br>Entrez Gene ID(s) 34        | FMN1    | 0.0036 | -1.33 |
| Memczak2013 ALT_ACCEPTOR,<br>ALT_DONOR, coding, INTERNAL, in     | PRPF19  | 0.0001 | -1.34 |
| Solute carrier family 31 (copper<br>transporter), member 1       | SLC31A1 | 0.0047 | -1.34 |
| Integrin beta 4                                                  | ITGB4   | 0.0000 | -1.36 |
| Mucin 12, cell surface associated                                | MUC12   | 0.0020 | -1.38 |
| Olfactory receptor, family 9,<br>subfamily Q, member 2           | OR9Q2   | 0.0000 | -1.44 |
| Neutrophil cytosolic factor 1                                    | NCF1    | 0.0446 | -1.59 |
